# Supplementary material for: Organic tunnel field-effect transistors
Source: Research Square preprint supplement (doi:10.21203/rs.3.rs-3432464/v1), 2023-10-26
Supplement: Supplementary file 1 [file 77fecd09d6b506ea68bb541a.docx]

**Supplementary information**

**Organic tunnel field-effect transistors**

Wei Deng1,2,6, Zhenjun Lu1,2,6, Yujian Zhang1,2,6, Xiujuan Zhang1,3*, Fengquan Qiu1, Yongji Wang1, Haoyu Jiang1, Xiaobin Ren1, Yiming Wu4, Xian-Kai Chen1,2, Jiansheng Jie1,2,5* and Xiaohong Zhang1,3*

1Institute of Functional Nano & Soft Materials (FUNSOM), Soochow University, Suzhou, Jiangsu, P. R. China

2Jiangsu Key Laboratory for Carbon-Based Functional Materials & Devices, Soochow University, Suzhou, Jiangsu, P. R. China

3Jiangsu Key Laboratory of Advanced Negative Carbon Technologies, Soochow University, Suzhou, Jiangsu, P. R. China

4Institute of Materials Research and Engineering, Agency for Science, Technology and Research (A*STAR), Singapore

5Macao Institute of Materials Science and Engineering (MIMSE), MUST-SUDA Joint Research Center for Advanced Functional Materials, Macau University of Science and Technology, Taipa, Macau, P. R. China

6These authors contributed equally: Wei Deng, Zhenjun Lu, Yujian Zhang

email: xjzhang@suda.edu.cn; jsjie@suda.edu.cn; xiaohong_zhang@suda.edu.cn

**Extended Data Fig. 1: Energy level structure and conductivity of MoO3**. **a,** Ultraviolet photoelectron spectroscopy (UPS) spectrum of MoO3 film with an excitation energy of 21.22 eV. The work function was determined to be 6.82 eV. **b,** Current-voltage curve of a 10-nm thick MoO3 layer. The area of overlap of MoO3 and Ag electrode is 6 × 10-4 cm2. The conductivity wasdetermined to be 0.526 mS m-1.


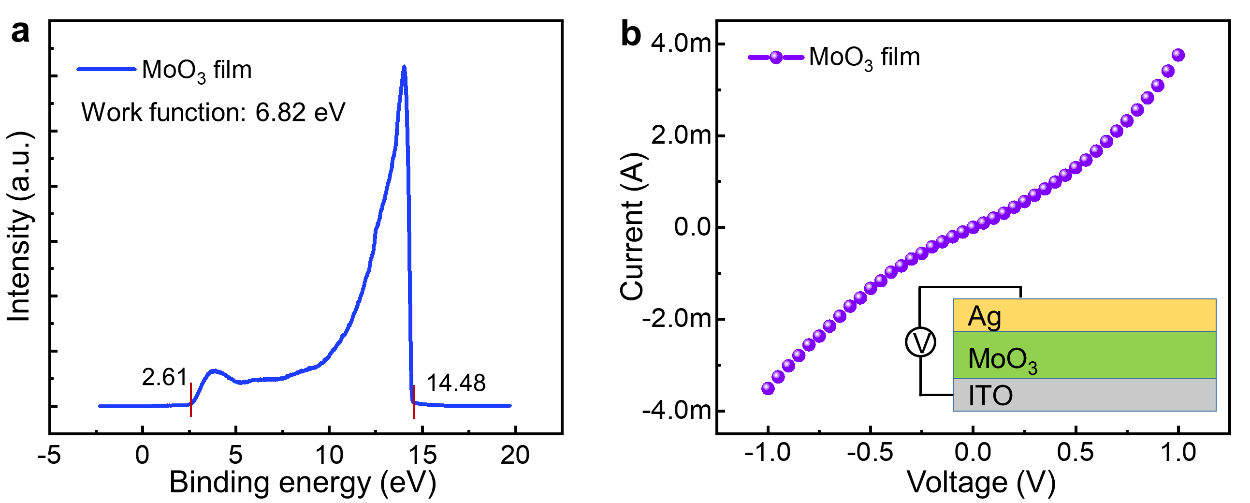


**Extended Data Fig. 2: BPE-PTCDI decoupling layer on the C8-BTBT film. a,** Atomic force microscopy (AFM) height image of the boundary between C8-BTBT film and BPE-PTCDI decoupling layer. Inset: corresponding height profile across the boundary. **b,** Scanning Kelvin probe microscopy (SKPM) image of the boundary. A lower surface potential was observed on the BPE-PTCDI, showing that the BPE-PTCDI decoupling layer has a higher IE compared to the C8-BTBT semiconductor layer.


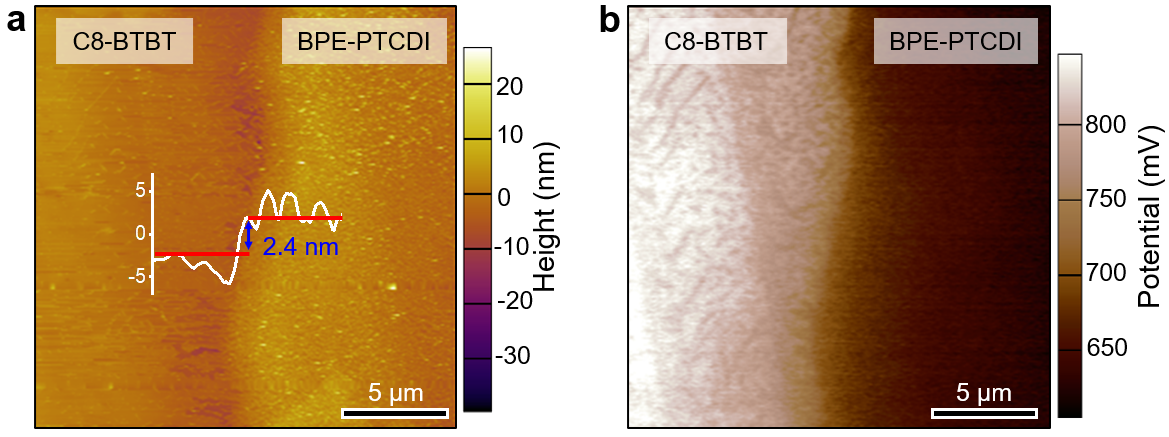


**Extended Data Fig. 3: Characterizations of MoO3 and C8-BTBT heterojunctions with/without molecular decoupling layer. a,** Topography and **b,** the corresponding XRD pattern of the C8-BTBT single-crystalline film after peeling upper metal electrode, MoO3 layer, and decoupling layer off from its surface. Inset to **a**: corresponding height profile of the sheet-like grain on the surface of C8-BTBT thin film. **c,** Topography and **d,** the corresponding XRD pattern of theC8-BTBT single-crystalline film after peeling the upper metal electrode and MoO3 off from its surface. An increase in XRD peak width was observed, showing crystallinity degeneration. By comparison, we found that the underlying C8-BTBT film could reserve its original morphology and structure after decoration of theBPE-PTCDI layer.


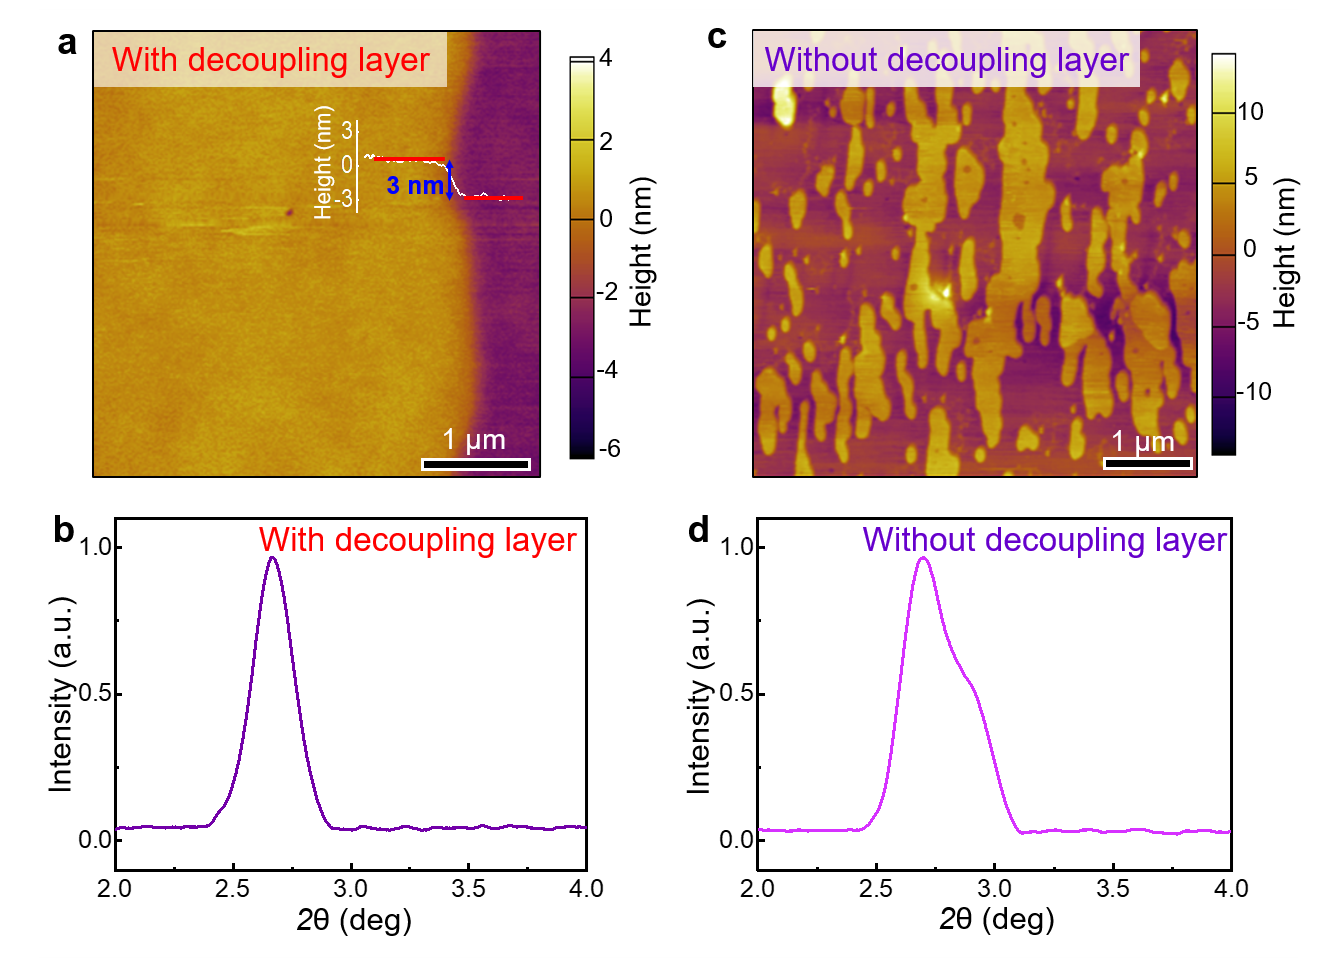


**Extended Data Fig. 4: Hysteresis of our OTFET. a,** Forward- and reverse-sweep *I*DS-*V*GS curves of the device. The gray line is the gate leakage current (*I*GS). **b,** Zoom-in of the transfer curves in the subthreshold regime, showing minimum *SS* below 60 mV dec-1 for both forward and reverse sweeps.


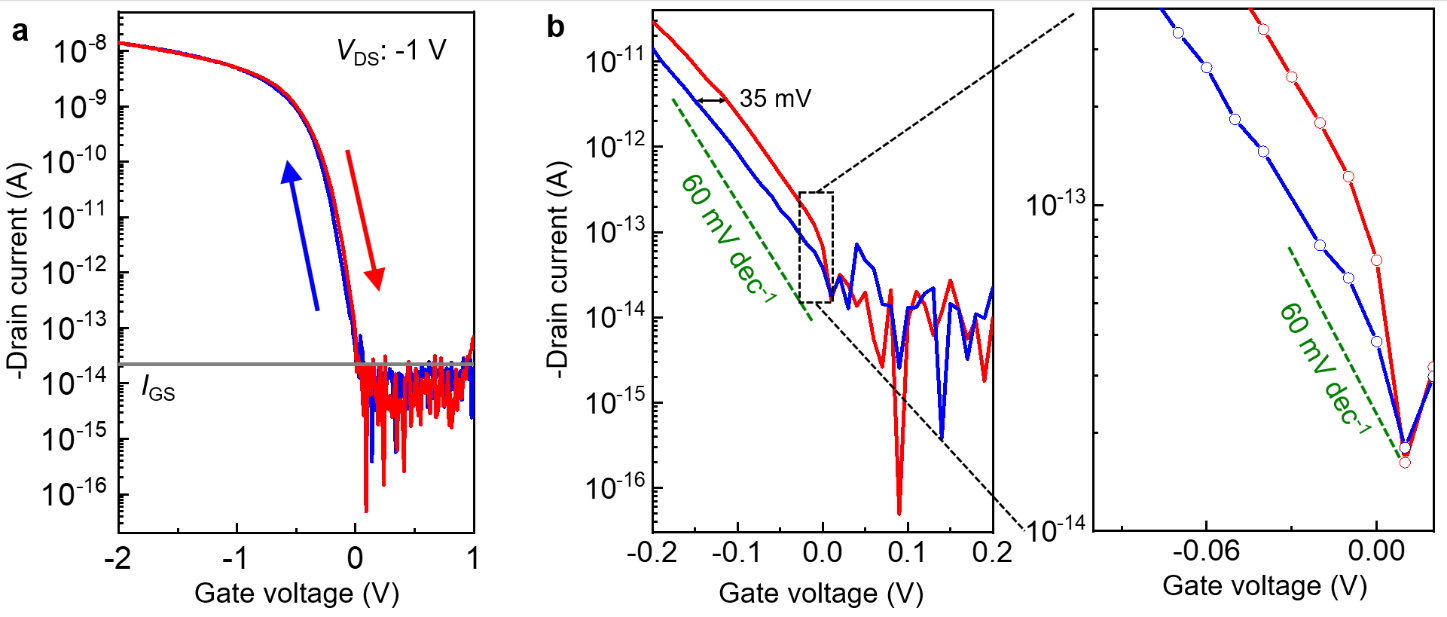


Since hysteresis usually originates from the charge traps inside the device channel and at the interface between the semiconductor and dielectric1, providing a high-quality organic semiconductor layer and interface during device fabrication is crucial for reducing hysteresis. In this study, we used C8-BTBT single-crystalline film as a channel and polymer PS to passivate the interface, thus the OTFET shows very small hysteresis (~0.035 V) at the subthreshold regime.

**Extended Data Fig. 5:** **Comparison of switching characteristic for our OTFET with that of a conventional organic transistor**. *SS* value as a function of *I*DS for the OTFET and a conventional organic transistor fabricated without BPE-PTCDI decoupling layer. The green line demarcates the thermionic limit of *SS* in conventional metal–oxide–semiconductor field-effect transistor (MOSFET).


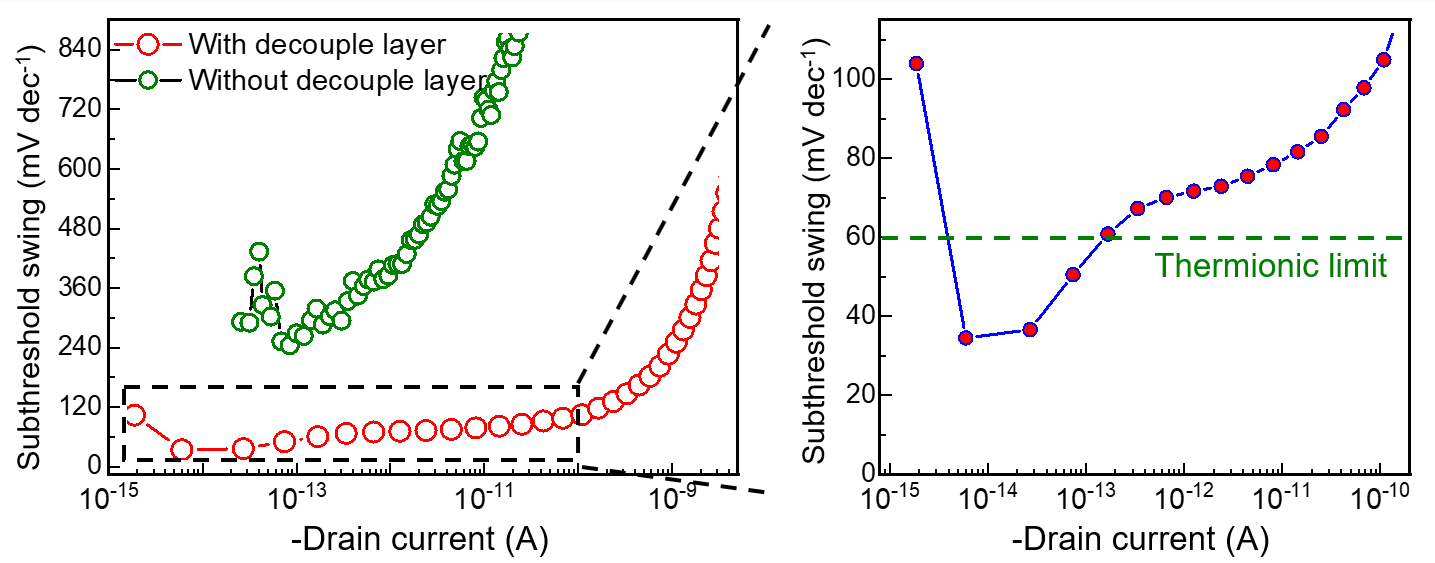


We extracted *SS* versus *I*DSfrom the transfer curve in Fig. 2a. The point *SS* was below 60 mV dec-1 for more than one decade of drain current and the minimum point *SS* is as low as 34.5 mV dec-1.

where *I*DS is the drain current. The point *SS* in an OTFET can be very small at gate voltage where the drain current begins to rise rapidly.

The average *SS* values of 35.5, 48.8, 53.8 and 59.5 mV dec-1 are obtained over 1, 2, 3, and 4 decades of *I*DS, respectively. The data points within the range of *I*DS from around 1.9 × 10-15 A to 1.9 × 10-14/1.9 × 10-13/1.9 × 10-12/1.9 × 10-11 A are used for obtaining the average *SS* values over 1(/2/3/4) decades of *I*DS.

where *V*OFF is the gate voltage at which the drain current begins to increase continuously, *I*OFF is the drain current at *V*GS = *V*OFF,*IVt* is the drain current over *I*OFF, *V*t is the corresponding *V*GS at *IVt*.

**Extended Data Fig. 6: Electrical properties of** **a control device without the BPE-PTCDI** **decoupling layer. a,** Transfer and **b,** output characteristics of the control device without decoupling layer, demonstrating a large *SS* of 613 mV dec-1 and a high operation voltage.


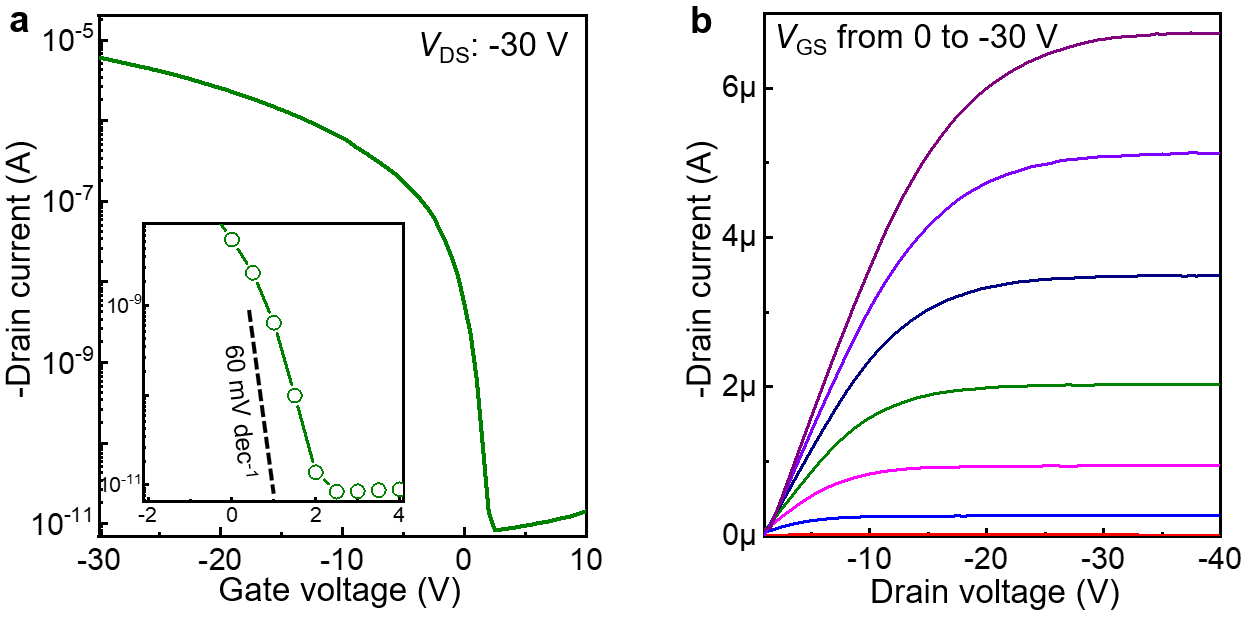


**Extended Data Fig. 7: Summary of the *P*sub-T for low-voltage organic transistors developed by using different methods**. The maximum and minimum *P*sub-T of our OTFETs are more than one order of magnitudes smaller than those obtained in the state-of-the-art low-power-consumption organic transistors.


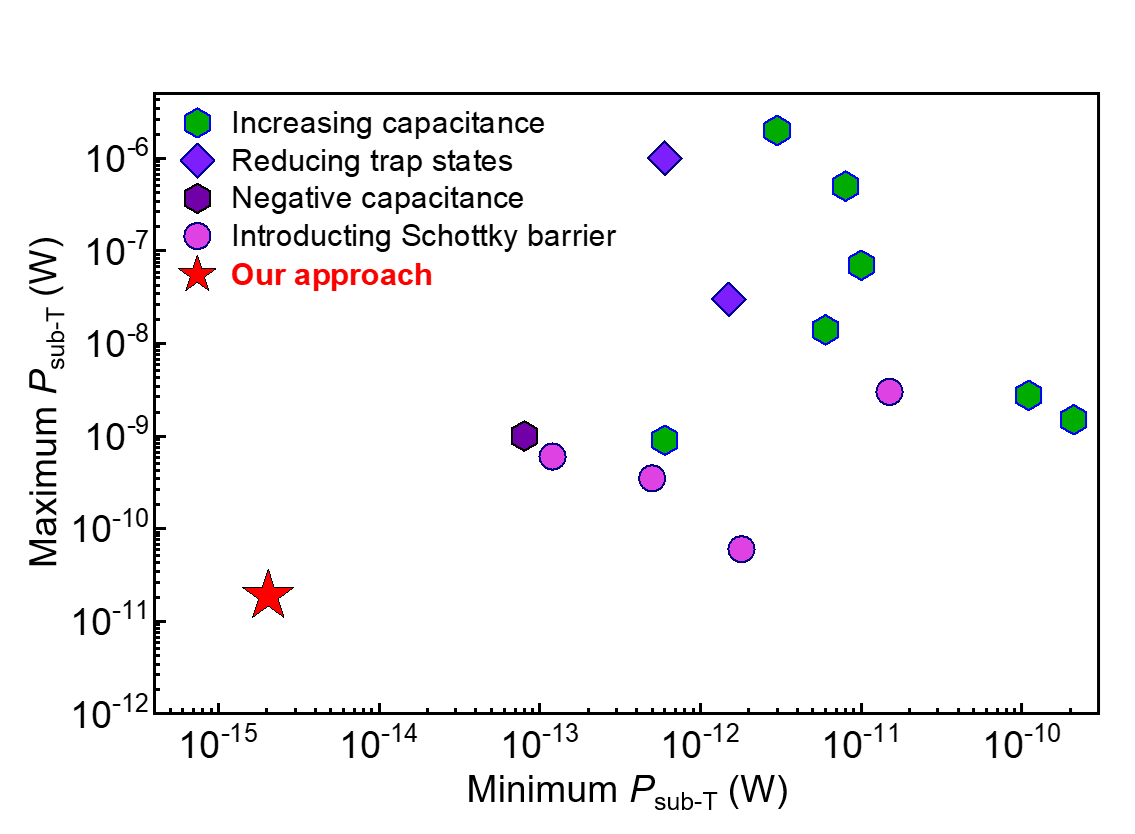


Organic transistors with high signal amplification efficiency will advance flexible and wearable technologies. Because the organic filed-effect transistors (OFETs) operated at the subthreshold regime can provide the largest signal amplification efficiency, power consumption at the subthreshold region (*P*sub-T) is particularly important for practical applications. The *P*sub-T can be calculated using:

where *V*DD is the supply voltage and *I*sub-T is the drain current at the subthreshold regime. For a typical OTFET, the *P*sub-T is in the 2.0 fW-18.8 pW range. The recent energy-related improvement methods to realize low-*P*sub-T organic transistors are summarized in Extended Data Fig. 7, including increasing dielectric capacitance, reducing carrier trap states, using negative capacitance effect, and inducing Schottky barrier2-15. It is evident from the figure that our strategy (decorating high-IE decoupling layer) can significantly reduce the *P*sub-T. The *P*sub-T of our OTFT is more than one order of magnitude lower than that of the state-of-the-art organic transistor obtained from the negative capacitance effect. The OTFT has ultralow power consumption, which can meet the key requirement for wearable applications, since a wearable system is portable along with a limited battery life-time and/or only micro-watt-level power harvesting technique with a battery-less system16.

**Extended Data Fig. 8: Temperature-dependent behavior of our** **OTFETs.** **a,** Transfer current-voltage characteristics with a fixed *V*DS = -1 V at temperature ranging from 190 to 300 K under a vacuum chamber. **b,** Magnified view of the subthreshold regime of the transfer curves. The classic thermionic limit at 300 K guideline has been plotted. **c**, Transfer curves of the OTFETs at different temperature of 300, 305, 310, 315, and 320 K in air atmosphere. **d,** Plot of *SS* versus temperature. The error bars denote the standard error of the mean by averaging over six devices.


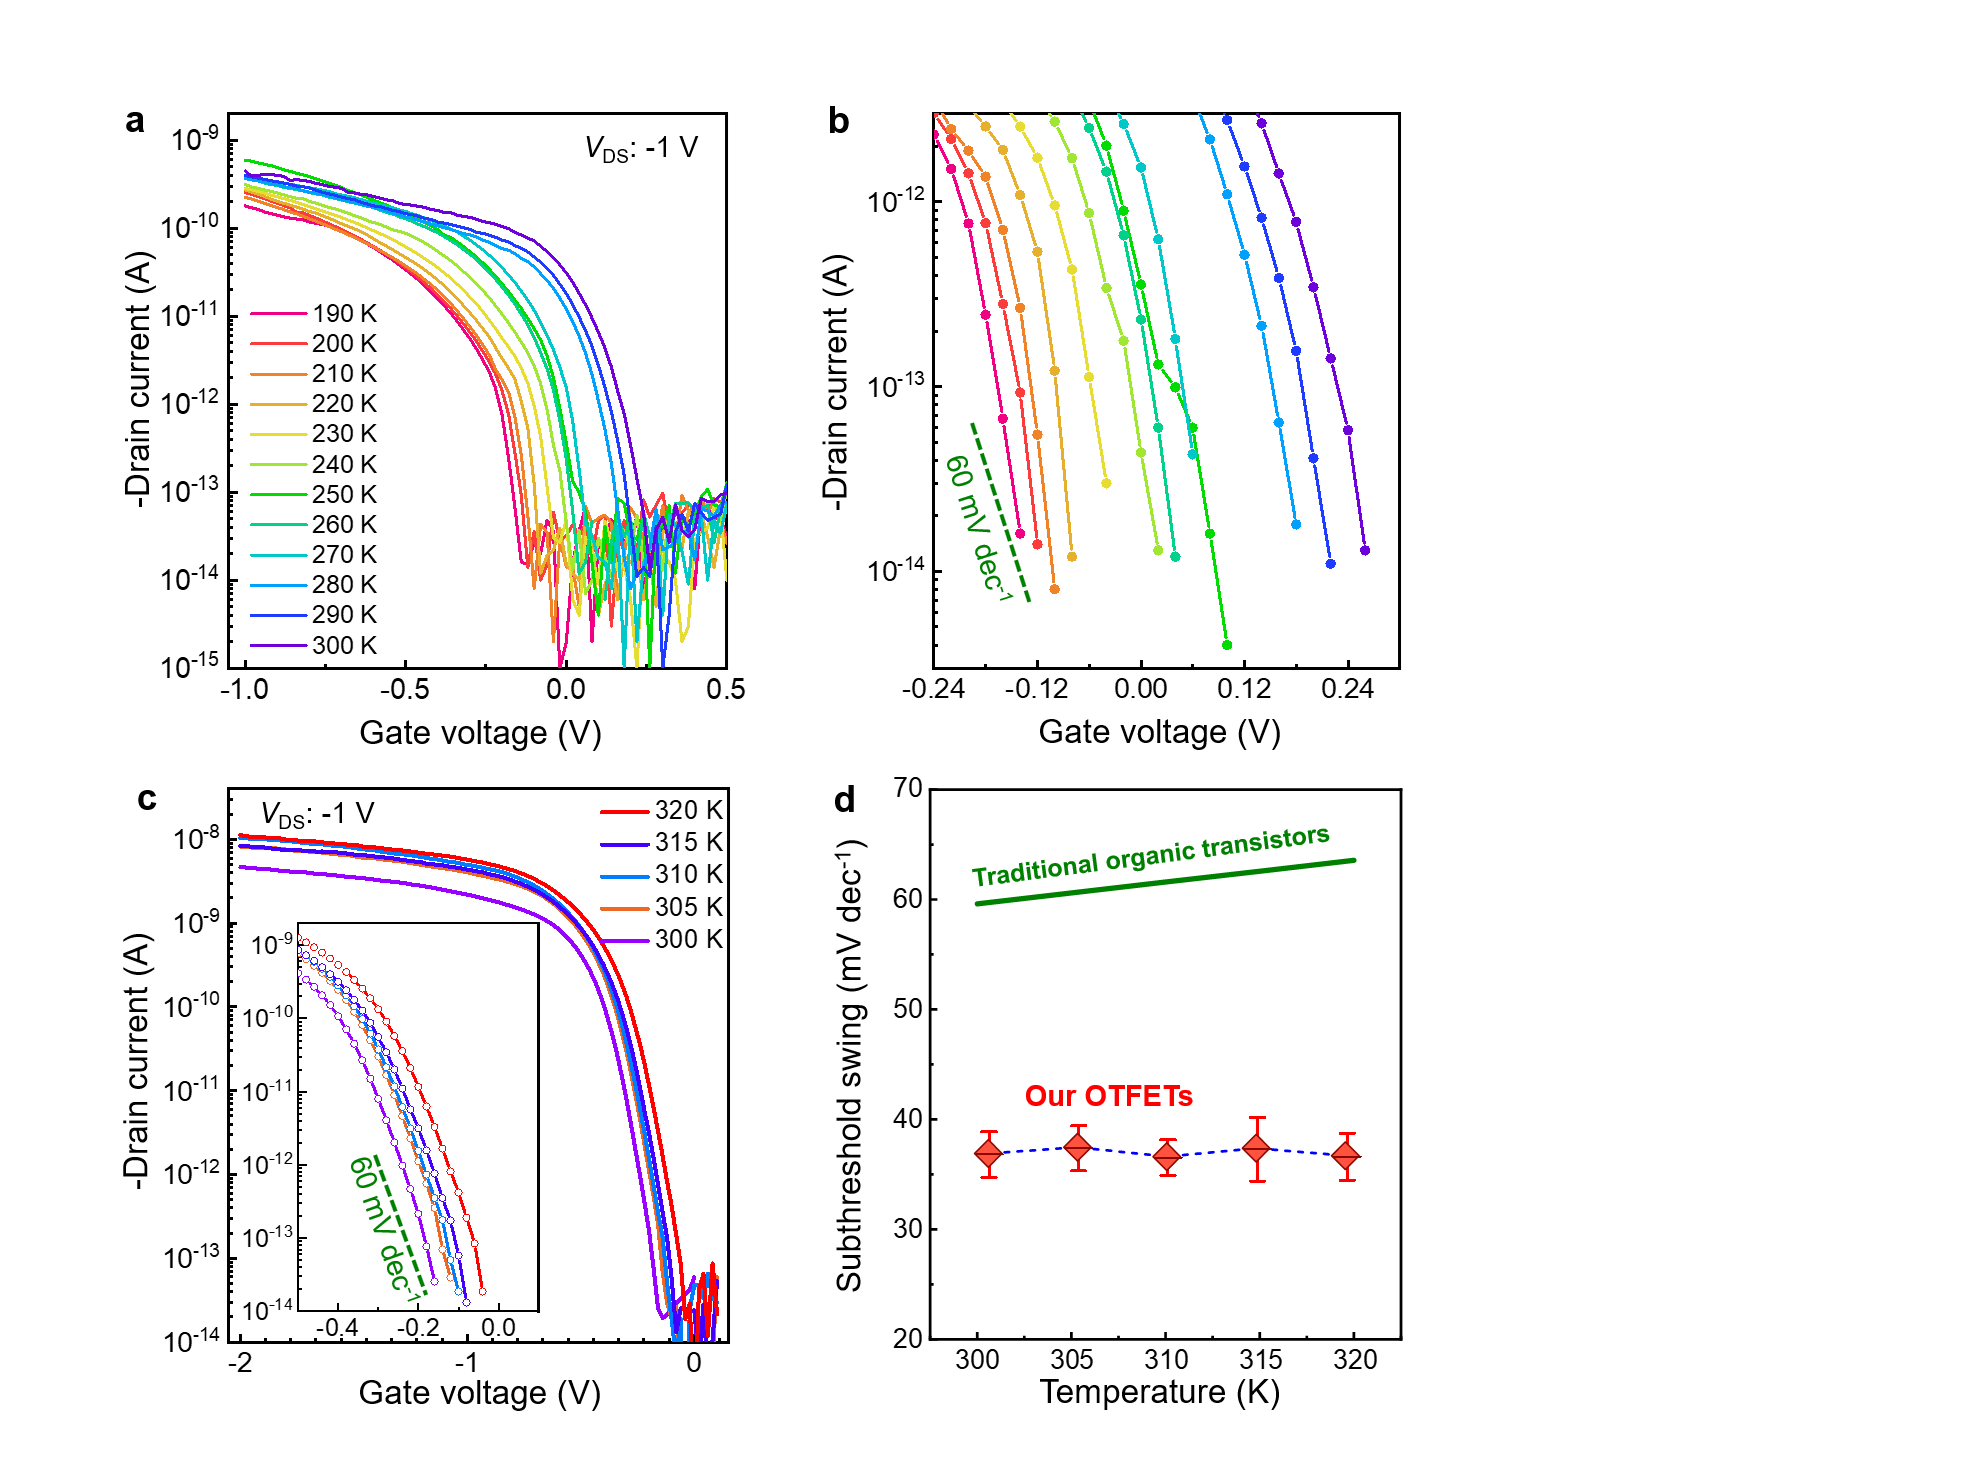


**Extended Data Fig. 9: Negative differential resistance (NDR) in the OTFET. a,** Output characteristics of the OTFET at forward bias, showing a trend towards NDR. **b,** Band diagrams explaining the existence of the trend towards NDR. **c**, Possible two NDR behaviors with forward bias voltage depending on the intrinsic doping levels of the p-n junctions: prominent NDR (blue) and trend toward NDR (red).


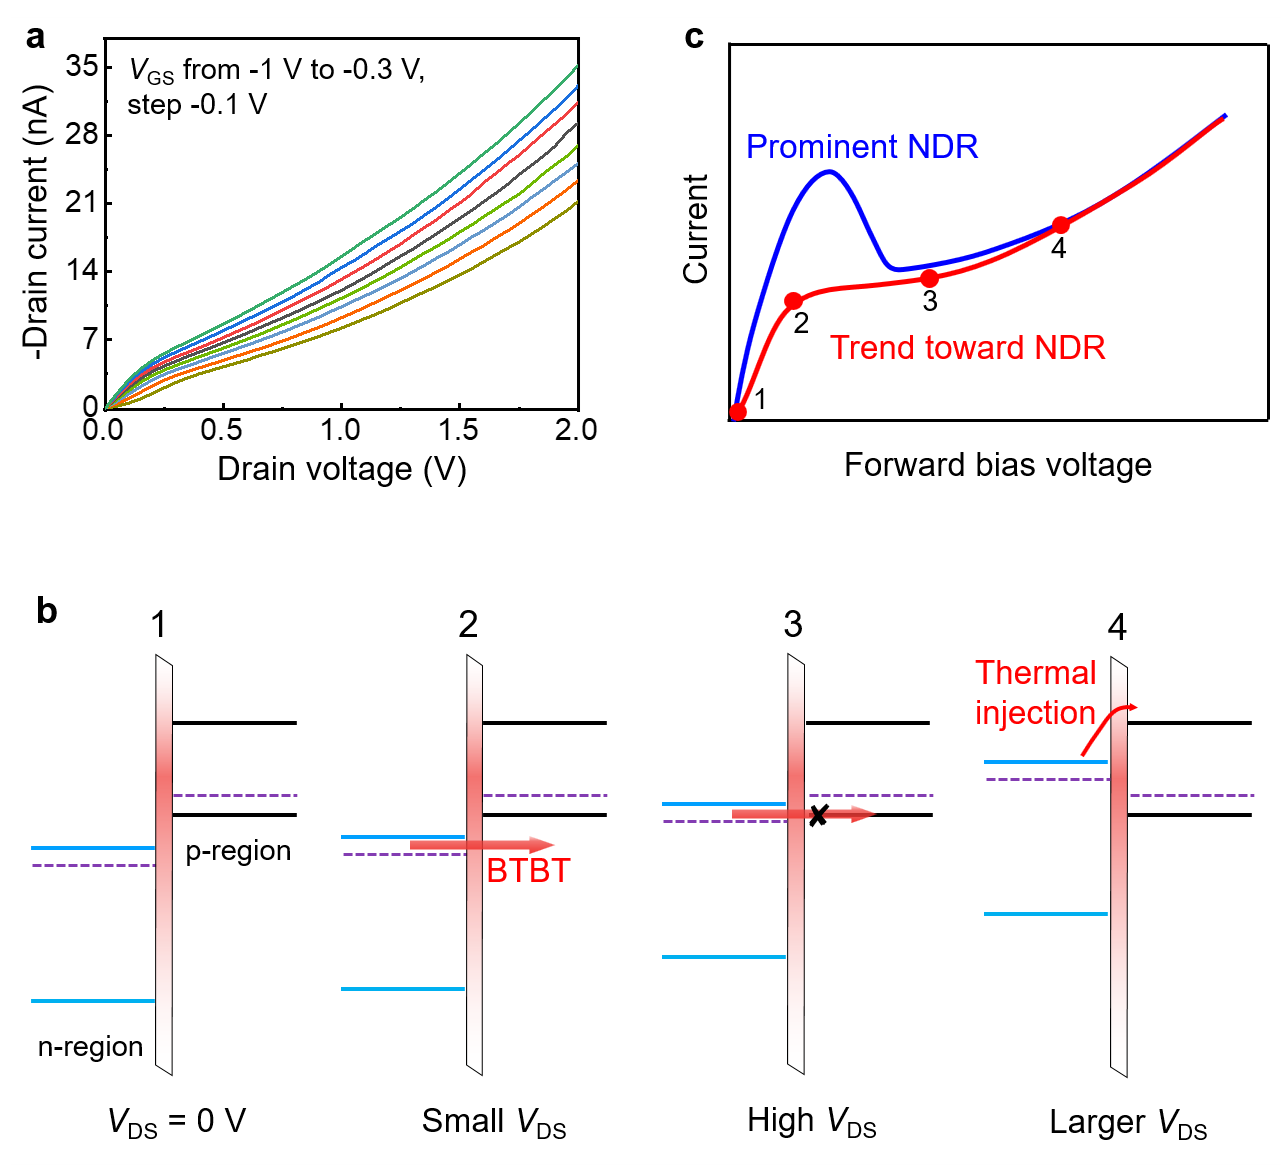


**Extended Data Fig. 10: Electronic properties of MoO3 and C8-BTBT from DFT calculations.** **a,** Total DOS for C8-BTBT and MoO3. **b,** Electronic band structures of MoO3 and C8-BTBT, illustrating the formation of a staggered heterojunction.


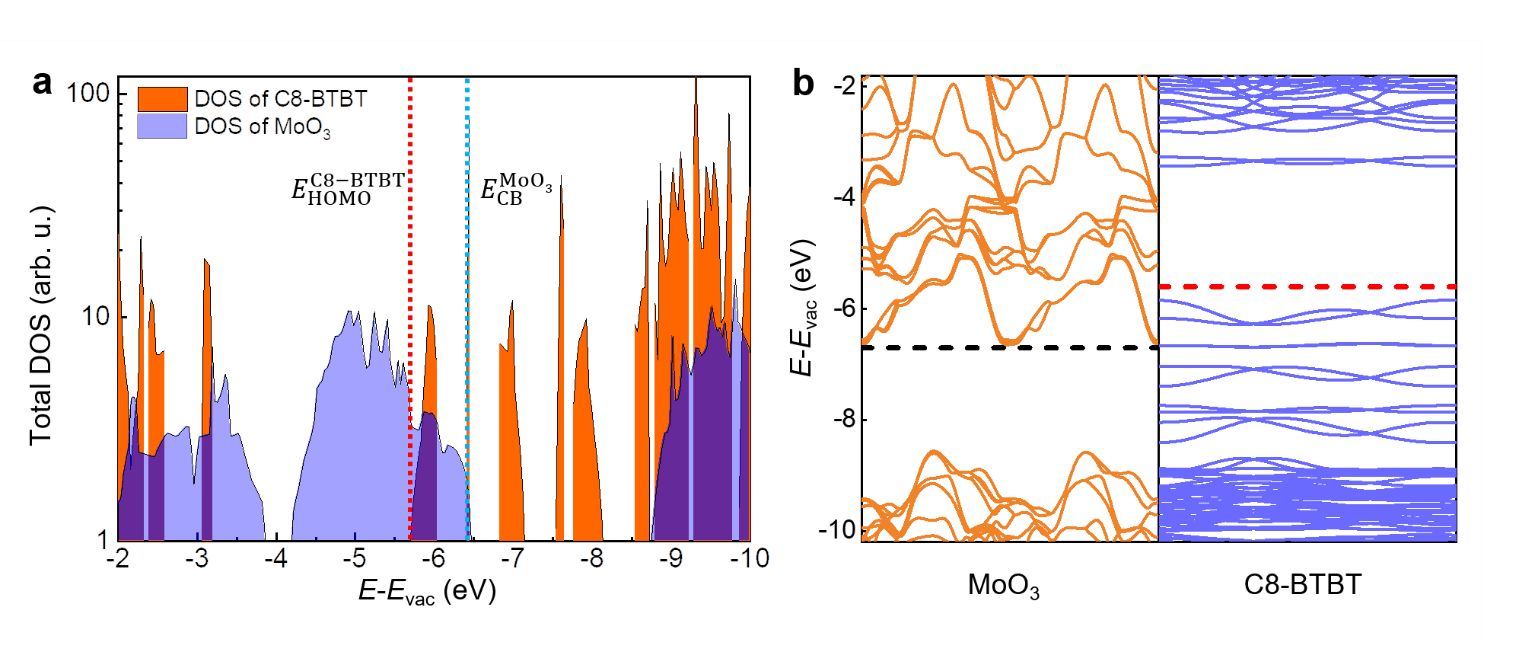


**Extended Data Fig. 11: Stability of our OTFET at different voltage sweep intervals. a,** Typicaltransfer characteristics under different gate voltage sweep intervals. **b,** *SS* as a function of the voltage sweep interval. *V*GS steps were set to be from 15 to 30 mV.


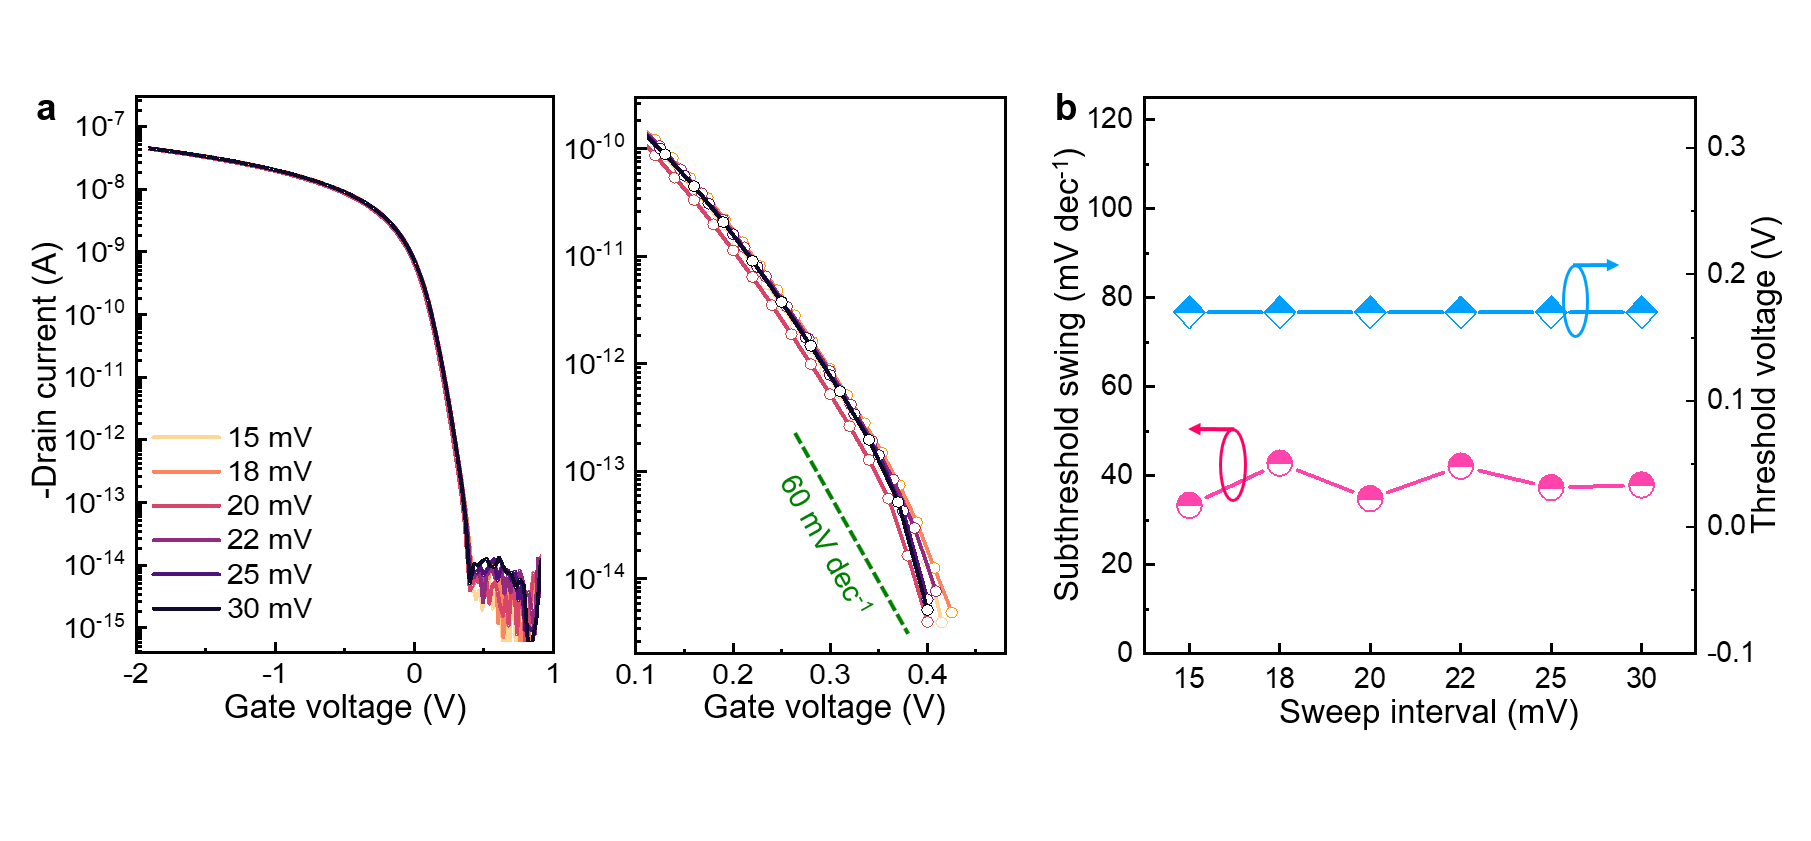
 **Extended Data Fig. 12: Multiple measurement stability of our OTFET. a,** Transfer characteristics under the different number of gate voltage sweep times. **b,** *SS* and *V*th as a function of the number of measurement time.


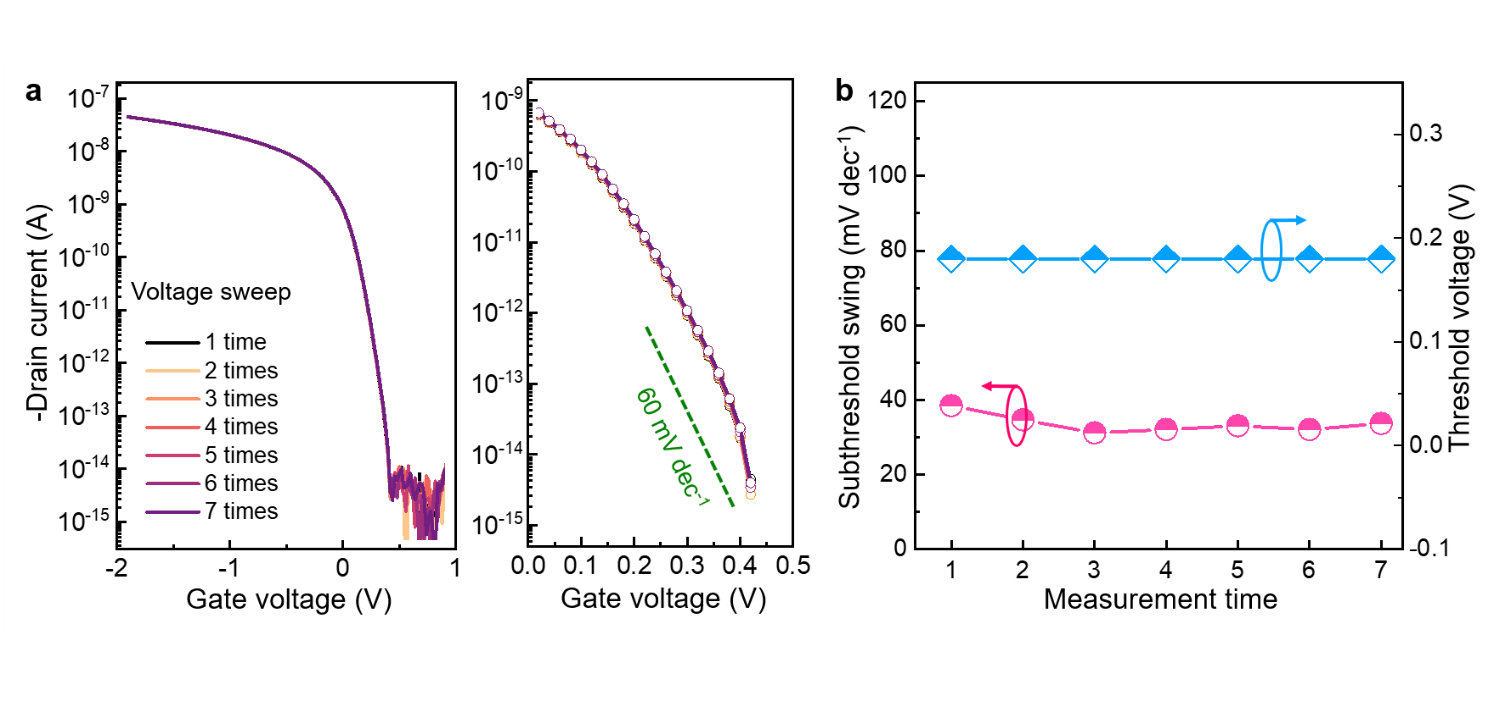


**Extended Data Fig. 13: Ambient stability of our OTFETs. a,** Transfer characteristics with fixed *V*DS = -1 V of the OTFET during the 7 months’ storage in the ambient air environment. **b,** Change of *SS* of the device over storage time.


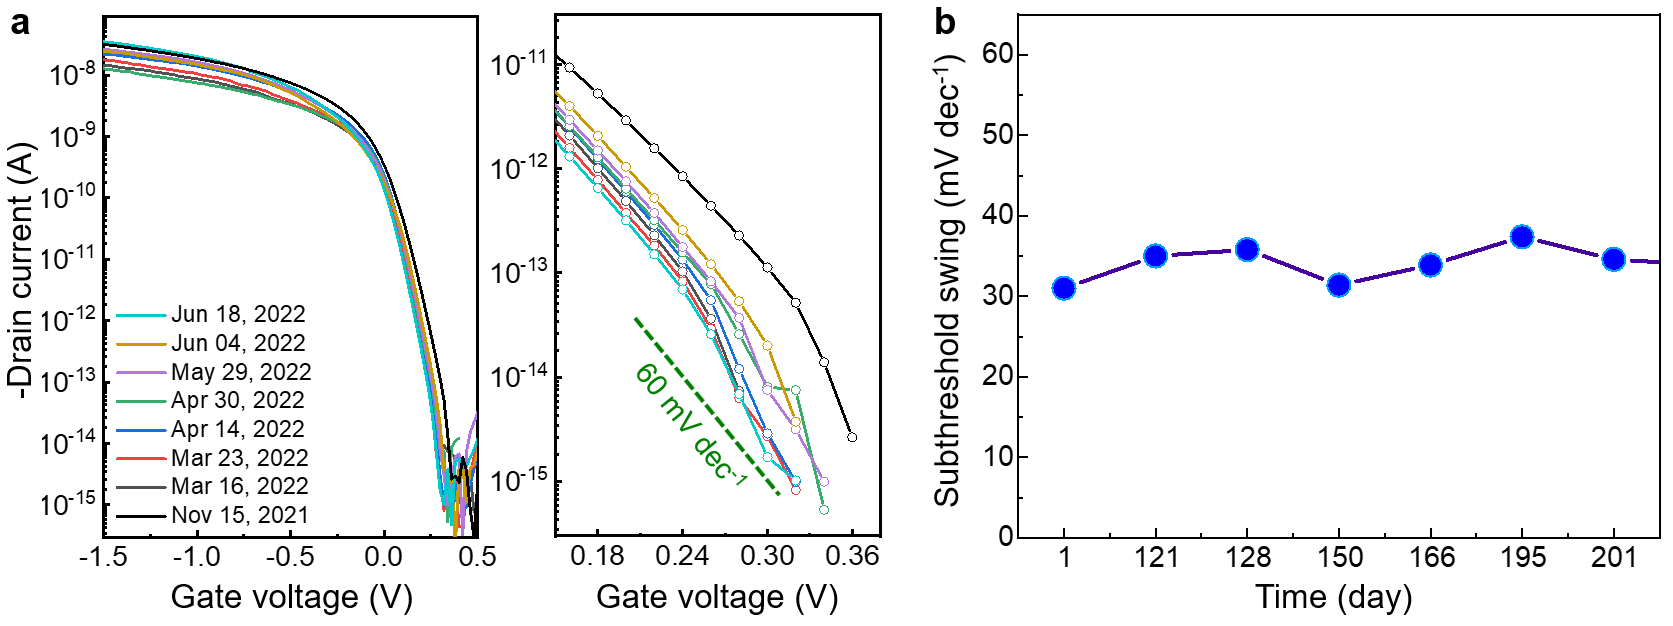


For real-world applications, the ambient stability of organic transistors is an important issue. Grain boundaries and defects in the device channel are responsible for the ambient instability of the corresponding OFETs17. Because we adopted single-crystalline OSC film as the device channel, our OTFETs should demonstrate good ambient stability. To verify the environmental stability of the OTFETs, long-term performance monitoring was carried out. The fabricated OTFET without any encapsulation was stored in a dry cabinet (humidity 10-20%) for 7 months. The transfer electrical characteristics were measured during the storage and the extracted *SS* over time are given in Extended Data Fig. 13. The device shows very robust stability with subthermionic *SS* during the 7 months’ storage.

**Extended Data Fig. 14: Operational stability tests for our** **OTFETs in ambient air. a**, On- and off-current with bias-stressing time, showing that the drain current of the presented OTFETs is electrically stable for 4000 s. **b**, Transfer curves of the OTFET under a gate-bias stress of *V*GS = -1 V and *V*DS = -1 V with an increase in stress time. **c, d,** Time evolution of the *SS,* on-state current (*I*on), and *V*T.


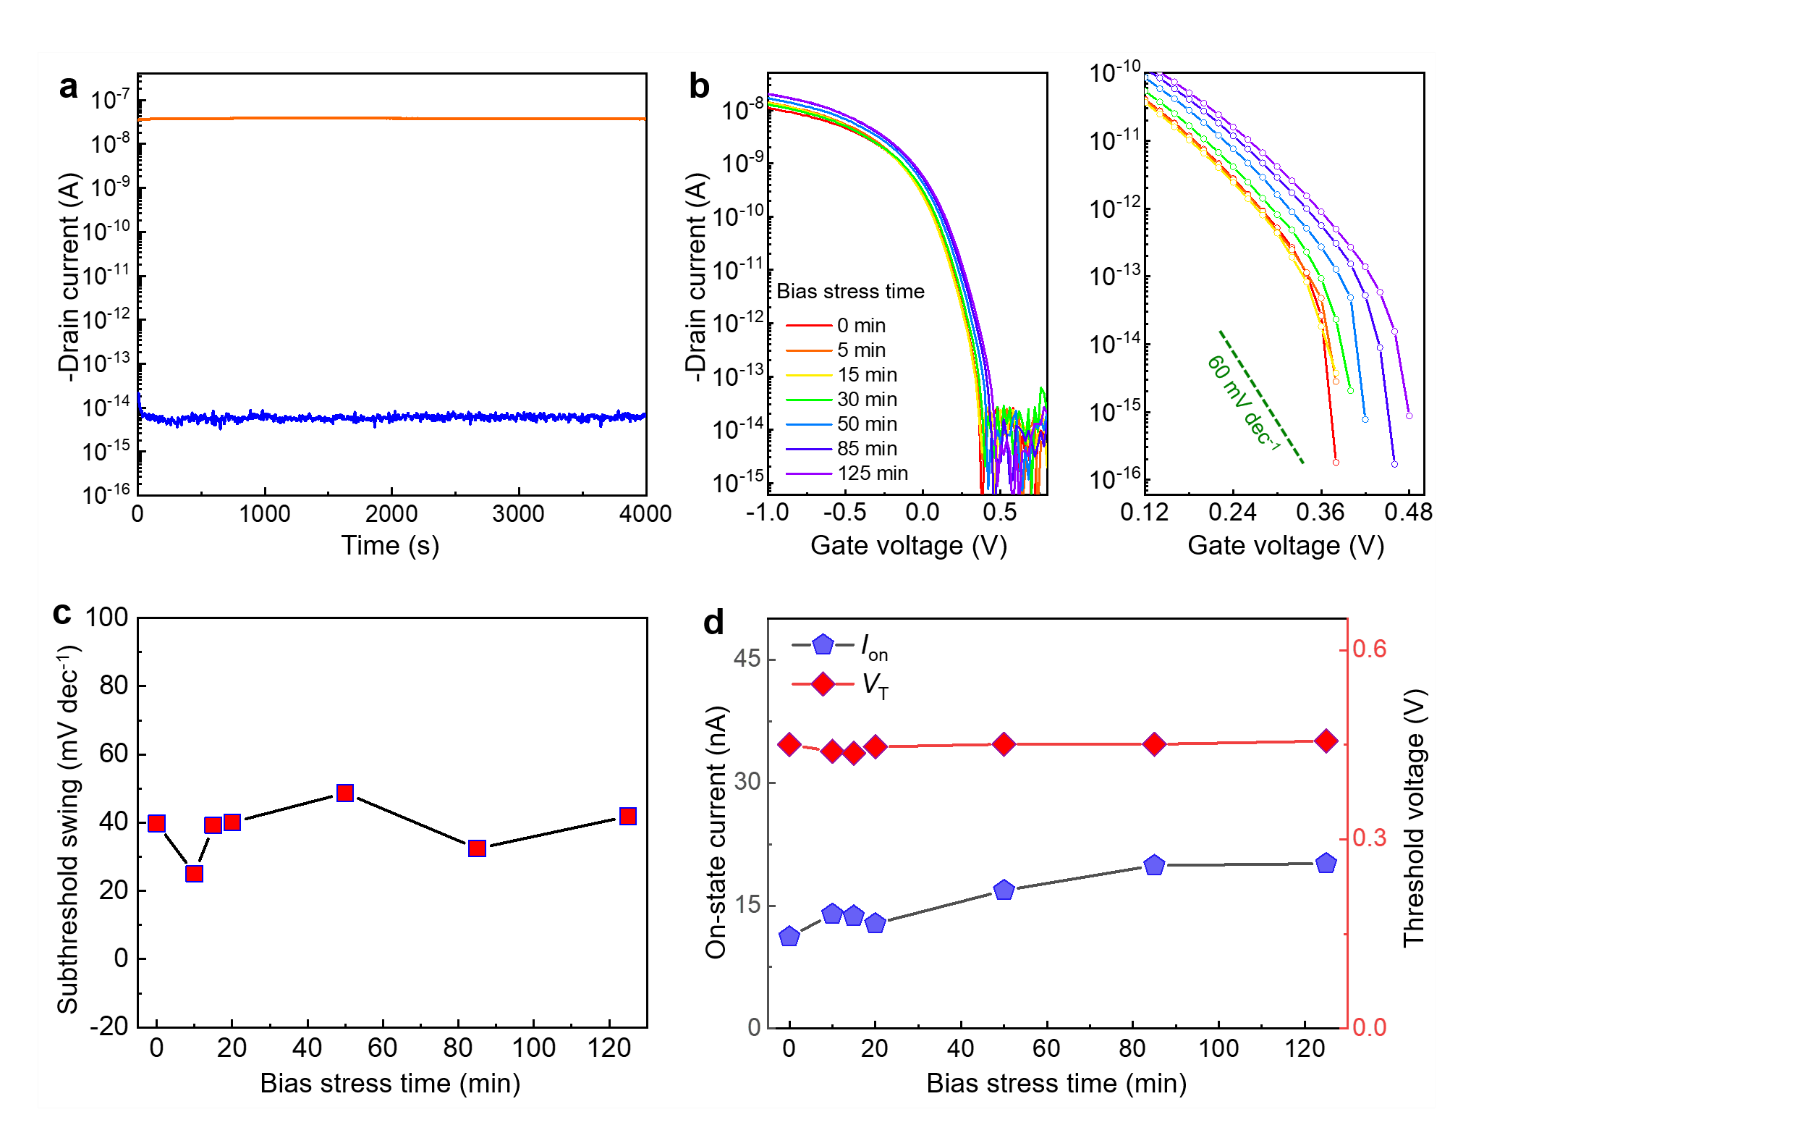


Since our OTFETs operate at a low voltage and low current, it should also be electrically stable for a long time. Here, we used the real operating bias conditions: *V*GS = -1 V and *V*DS = -1 V for on-state, *V*GS = 1 V and *V*DS = -1 V for off-state, seen in Extended Data Fig. 14. It was found that no prominent change in one-state current, off-state current and *V*T. While relatively small change in *SS* is observed, the *SS* values are always less than 60 mV dec-1 under constant biased conditions. The good stability is attributed to the operation of the transistor at a low voltage, the use of a trap-free dielectric, and the low trap density of the single-crystalline OSC channel. It is very important for real-world flexible wearable electronic device applications.

**Extended Data Fig. 15: Performance uniformity of the 5 × 5 OTFET array in a 0.28 cm2 area. a,** Optical microscopy (OM) and polarized optical microscopy images of the 5 × 5 OTFET array. The white arrows show the polarized directions of linear polarizers. **b,** Overlaid transfer curves of the 25 OTFETs. **c,** Histogram of *SS*, mobility (*μ*), and *V*T of the 25 OTFETs in the array. Average *SS* was 35.2 ± 7.6 mV dec-1,average *μ* was 2.95 ± 0.64 cm2 V-1 s-1, and average *V*th was -0.069 ± 0.0061 V. The red lines indicate the normal distribution.


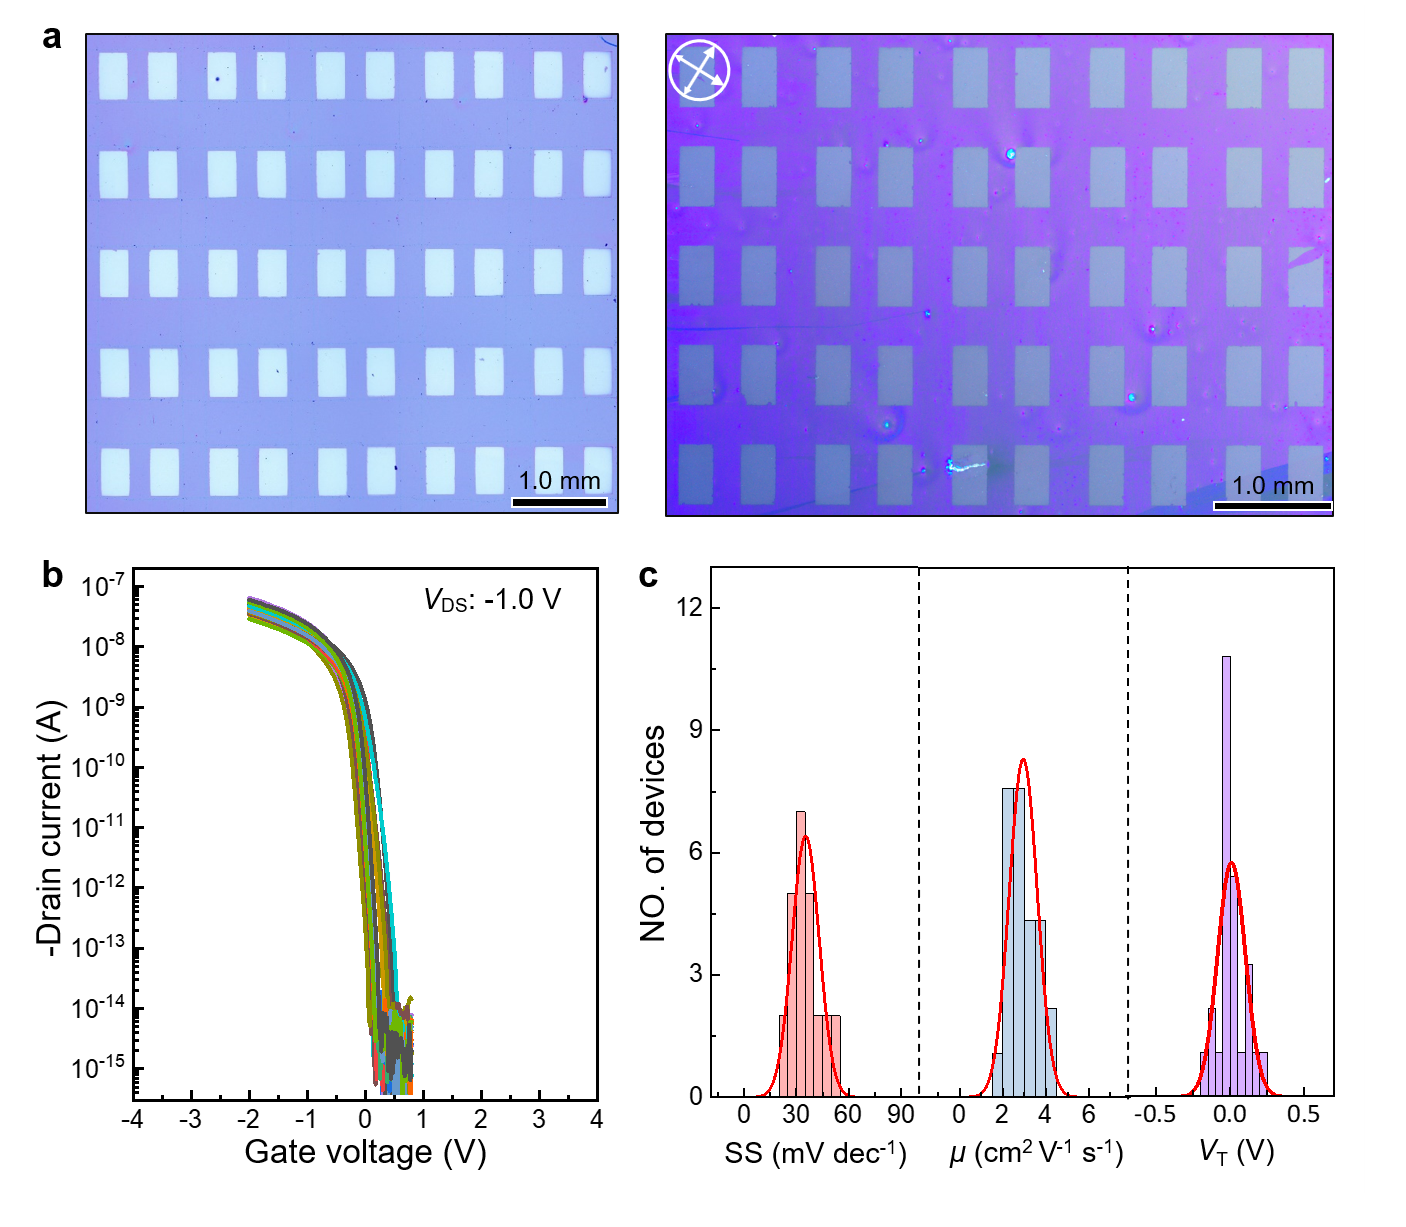


**Extended Data Fig. 16: Distribution of power consumption in the 5 × 5 OTFET array. a,** Statistical distribution of *P*sub-T of the 25 OTFETs in the array. **b,** Distributions of the maximum and minimum power consumption at the subthreshold regime. The red lines indicate the normal distribution.


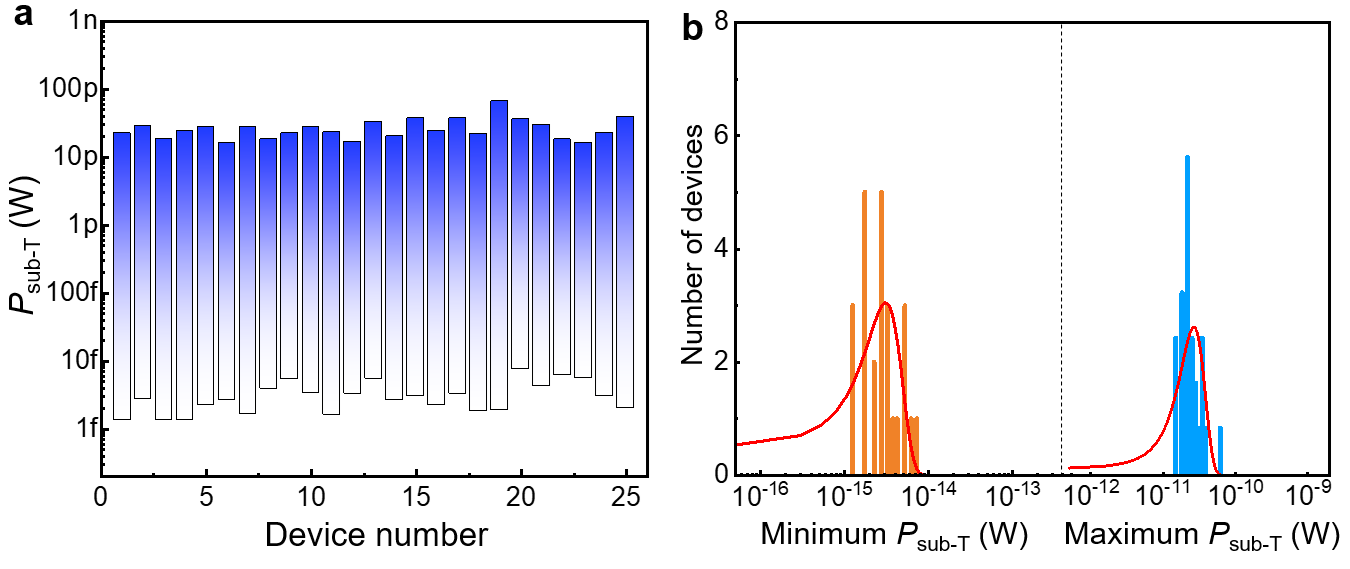


**Extended Data Fig. 17:** **Molecule-assisted interface decoupling strategy for other organic semiconductor. a**, Molecular structure of 2,7-Didecyl[1]benzothieno[3,2-b][1]benzothiophene (C10-BTBT) and polarized optical microscopy image of the C10-BTBT-based OTFETs. **b**, A representative transfer curve of the OTFETs with the C10-BTBT as a channel layer and corresponding output curve (**c**). **d**, Histogram of *SS* of the C10-BTBT OTFETs. The blue lines indicate the normal distribution.


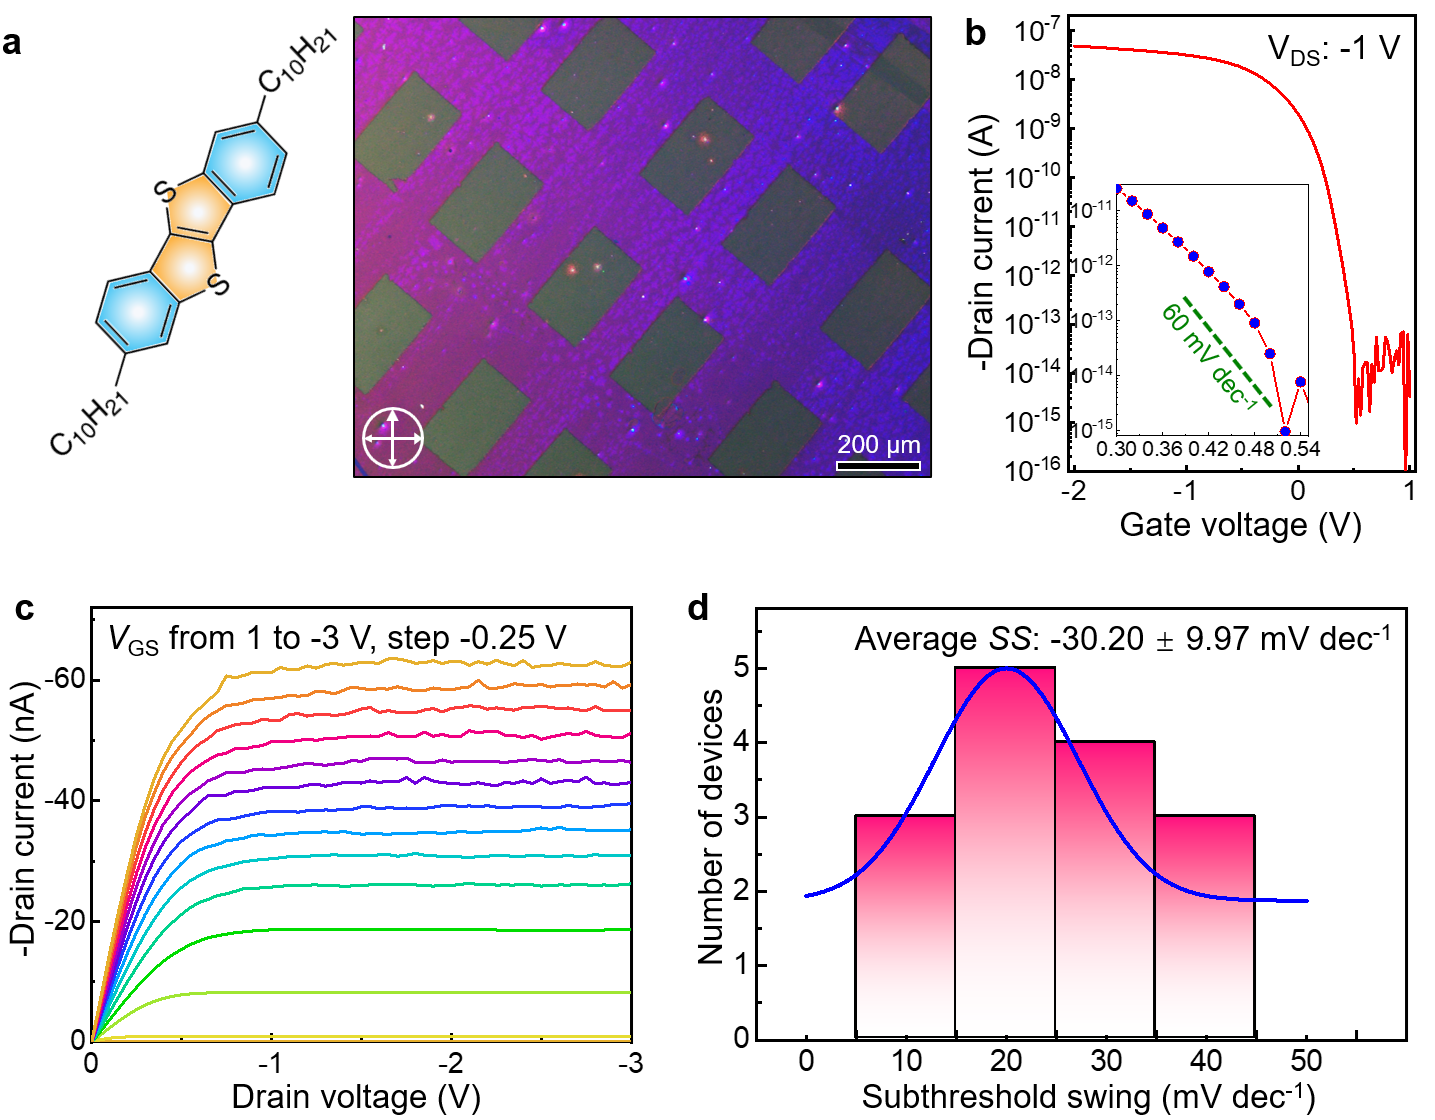


**Extended Data Fig. 18:** **Electrical properties of the OTFETs with decoration of C8-PTCDI and C60** **decoupling layers.** **a,** Overlaid transfer curves of the OTFETs with the use of a high-IE C8-PTCDI decoupling layer. **b,** Histogram of *SS* of the OTFETs. **c,** Overlaid transfer curves of the OTFETs with the use of a high-IE C60 decoupling layer. **d,** Histogram of *SS* of the OTFETs. The blue lines indicate the normal distribution.


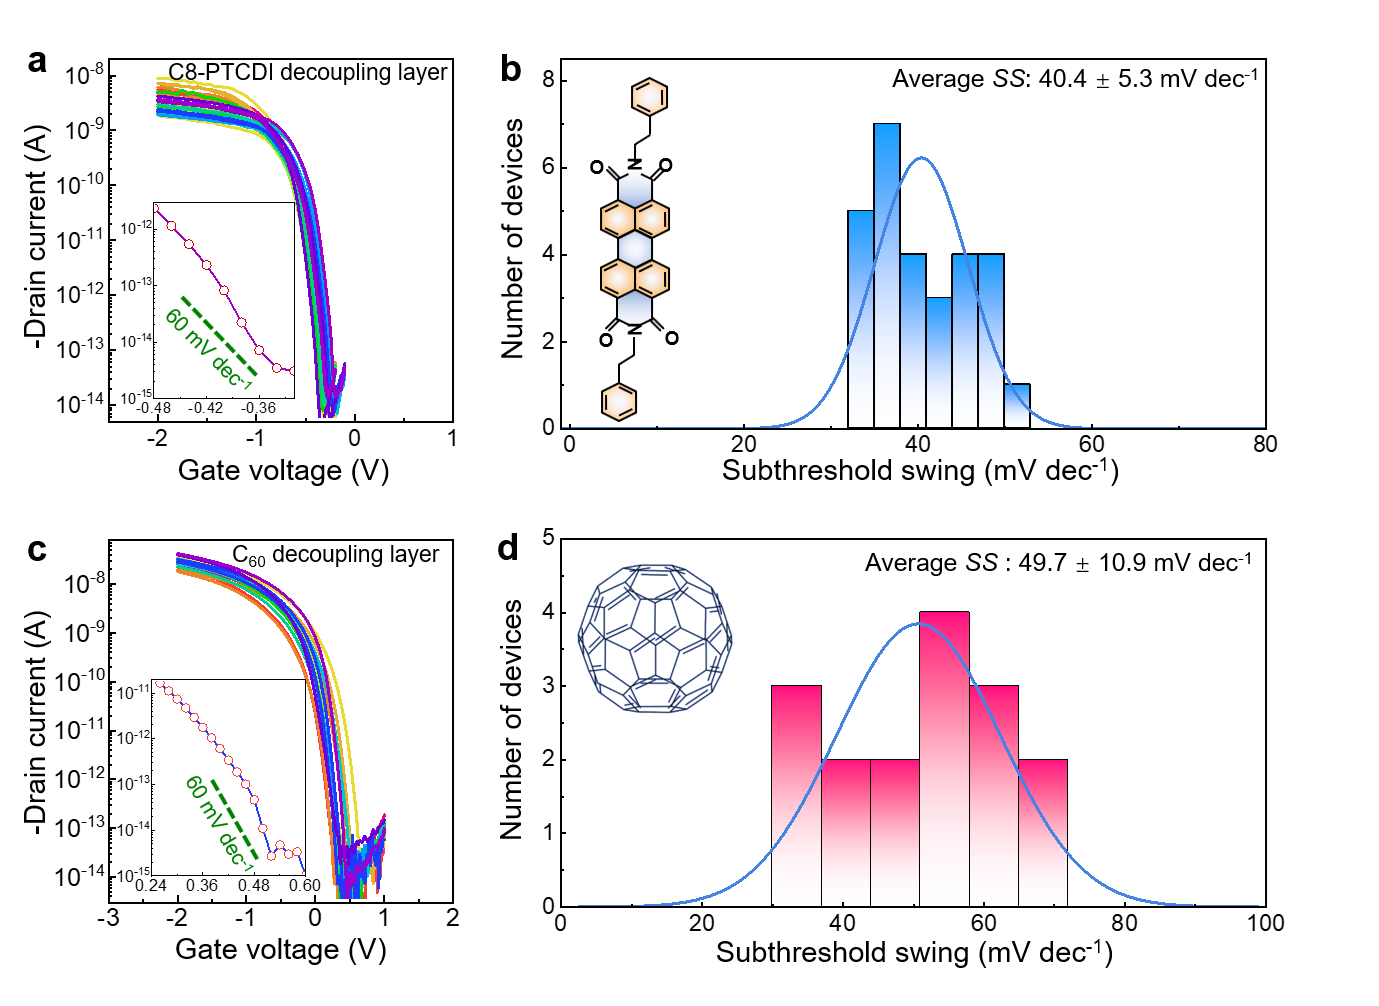


**Extended Data Fig. 19: Electrical properties of the organic transistors with the use of 2-TNATA (IE = 5.0 eV) and Spiro-TAD (IE = 5.3 eV) decoupling layers.** **a,** Overlaid transfer curves of the OTFETs with the use of a 2-TNATA decoupling layer. **b,** Histogram of *SS* of the OTFETs. **c,** Overlaid transfer curves of the 36 OTFETs with the use of a Spiro-TAD decoupling layer. **d,** Histogram of *SS* of the OTFETs. The blue lines indicate the normal distribution.


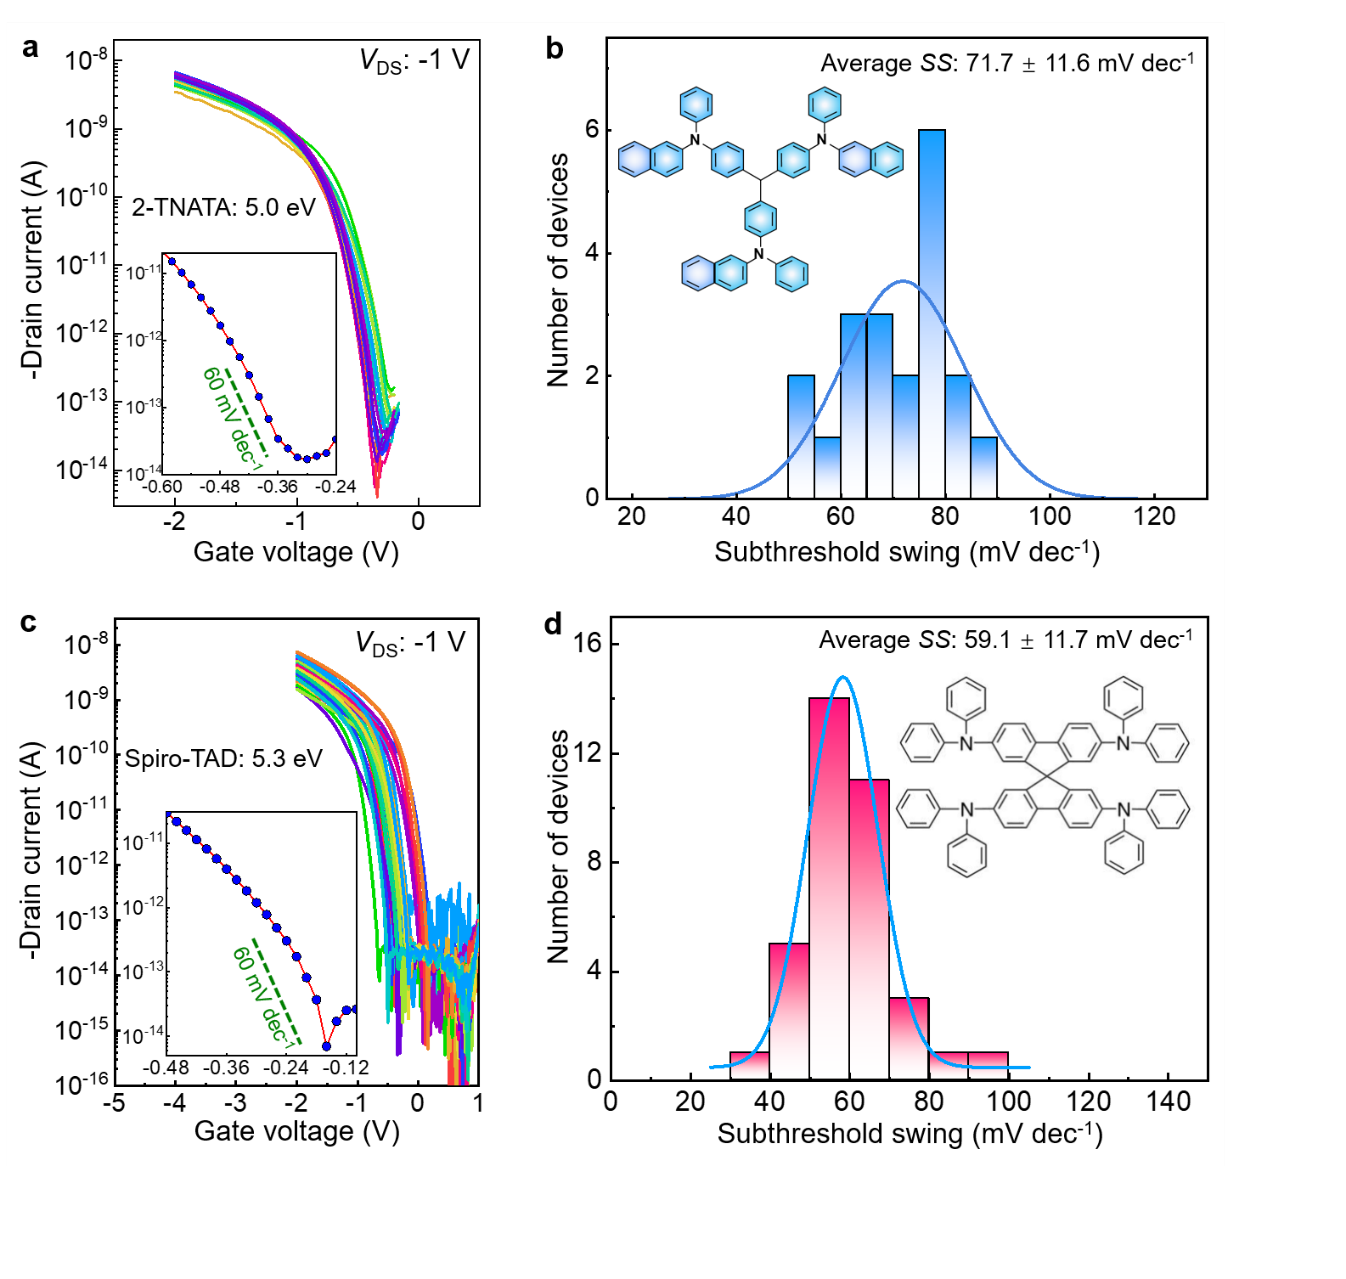


**Extended Data Fig. 20: Morphologies of the decoupling layers on the C8-BTBT surface.** AFM images of the BPE-PTCDI (**a**), C8-PTCDI (**b**), C60 (**c**), and 2-TNATA (**d**) thin films on the surface of C8-BTBT single-crystalline film. Scale bars, 1 μm in **a-d**.


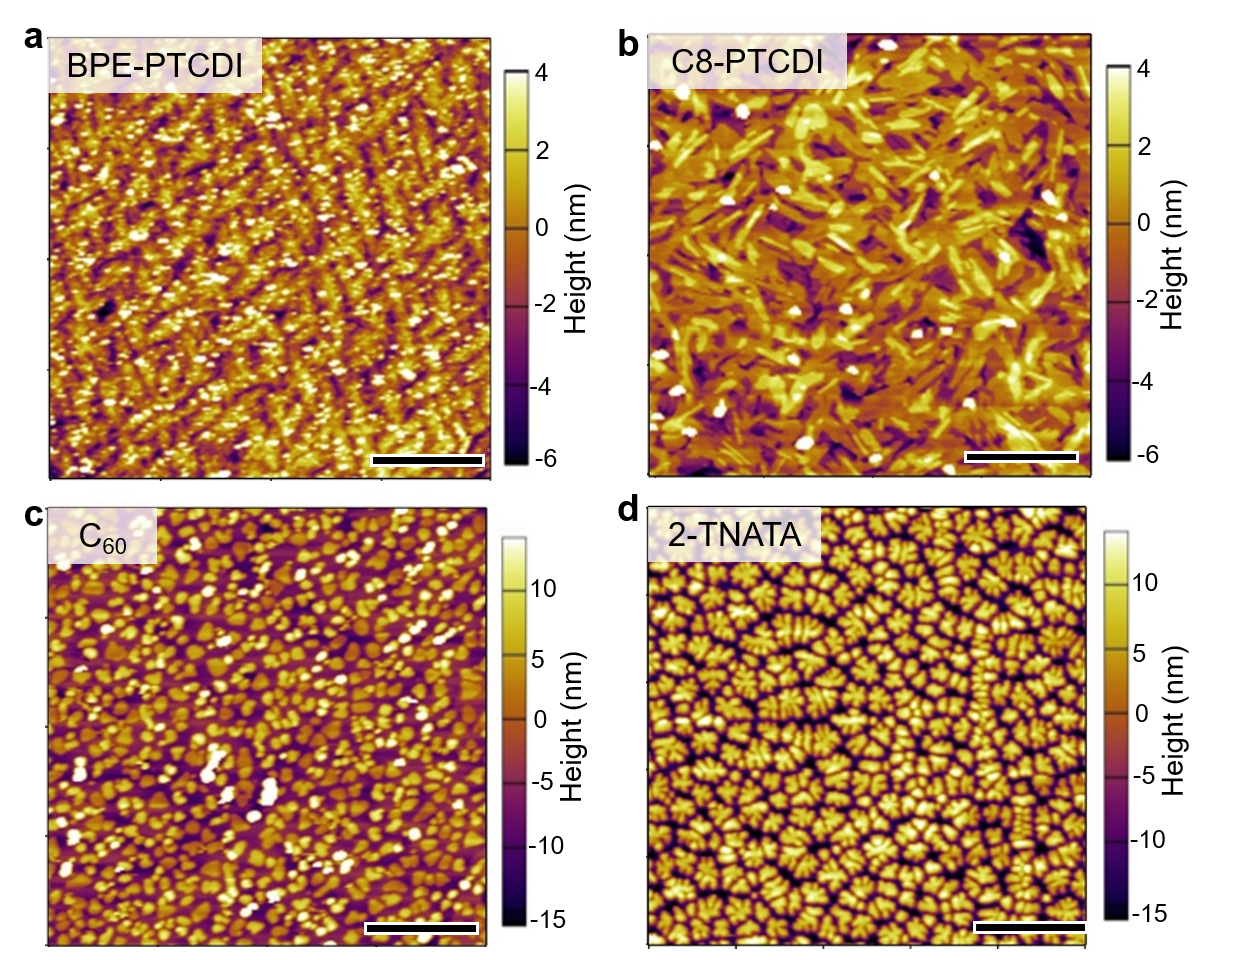


**Extended Data Fig. 21: Fabrication and polarized optical microscopy characterization of the C8-BTBT single-crystalline film. a,** Schematic of the fabrication method for the growth of large-sized C8-BTBT single-crystalline film. **b,** POM images of the C8-BTBT single-crystalline film captured under different polarization angles. **c,** Normalized intensity of the C8-BTBT single-crystalline film under POM as a function of polarization angle.


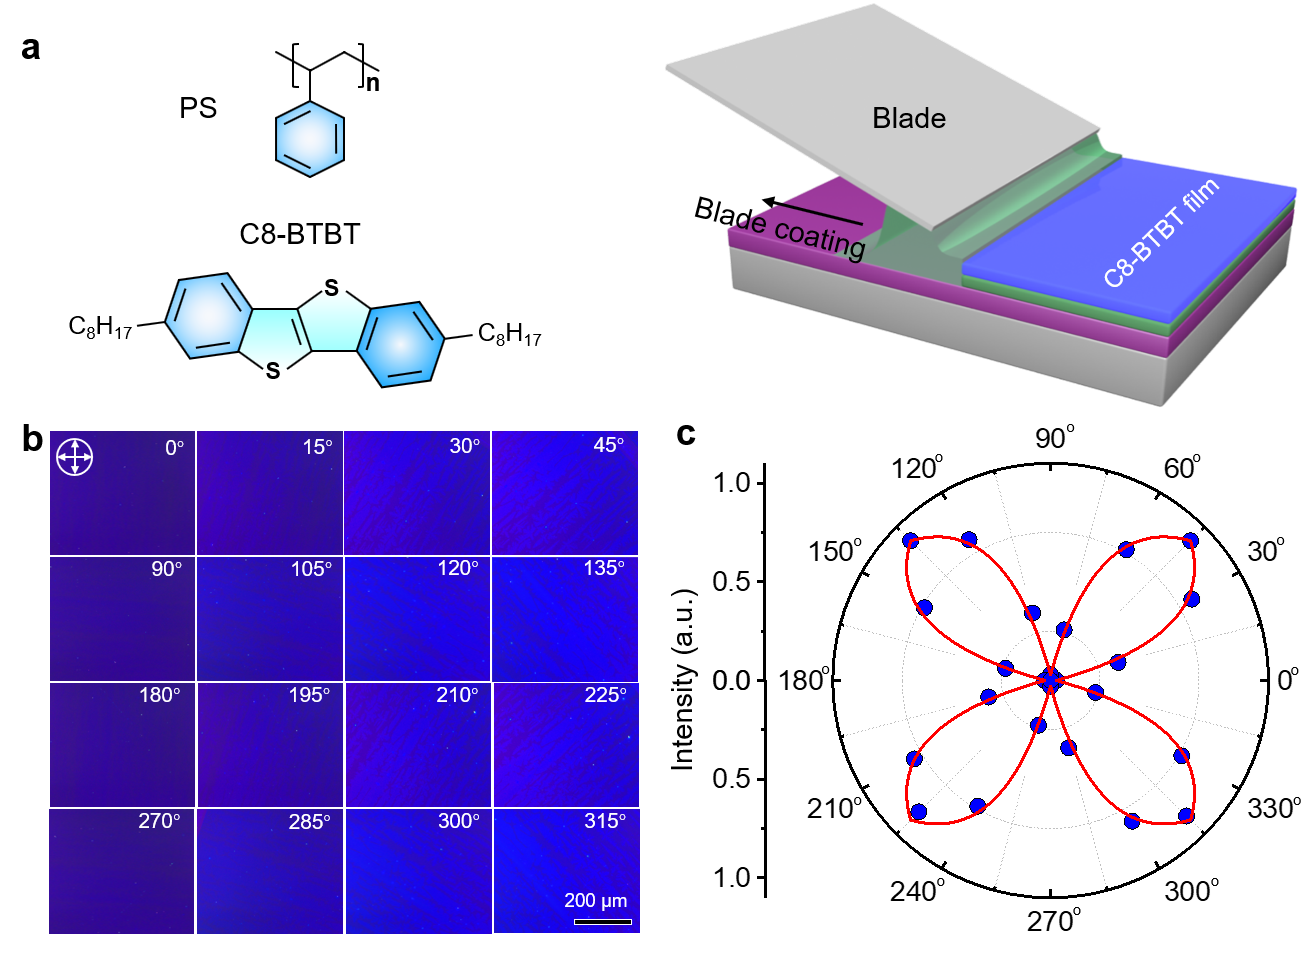


**Extended Data Fig. 22: TEM characterizations of the** **C8-BTBT single-crystalline film. a,** TEM image of the C8-BTBT single-crystalline film, confirming no grain boundaries and visible defects. **b-f,** Selected-area electron diffraction (SAED) patterns taken at the C8-BTBT regions. The yellow arrows highlight the directions of *a* and *b* axes of the C8-BTBT. The clear and identical diffraction patterns were observed at randomly selected regions, verifying the single-crystalline nature of the C8-BTBT film.


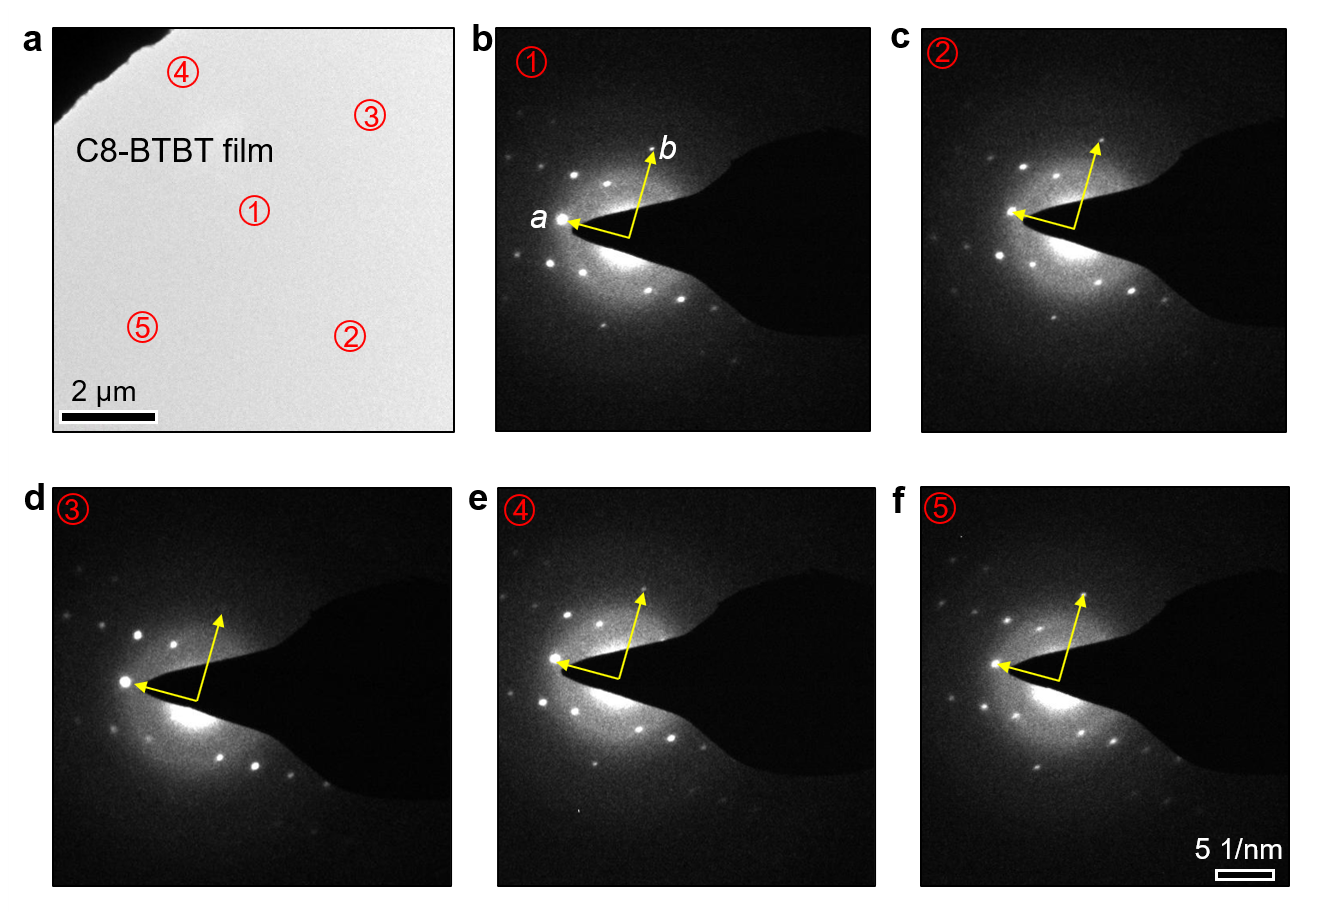


**Extended Data Fig. 23: XRD characterizations of the C****8-BTBT single-crystalline film. a,** Out-of-plane XRD pattern of the C8-BTBT single-crystalline film. **b,** In-plane XRD result of the (020) plane of the C8-BTBT. The grazing incident angle is 0.15°.


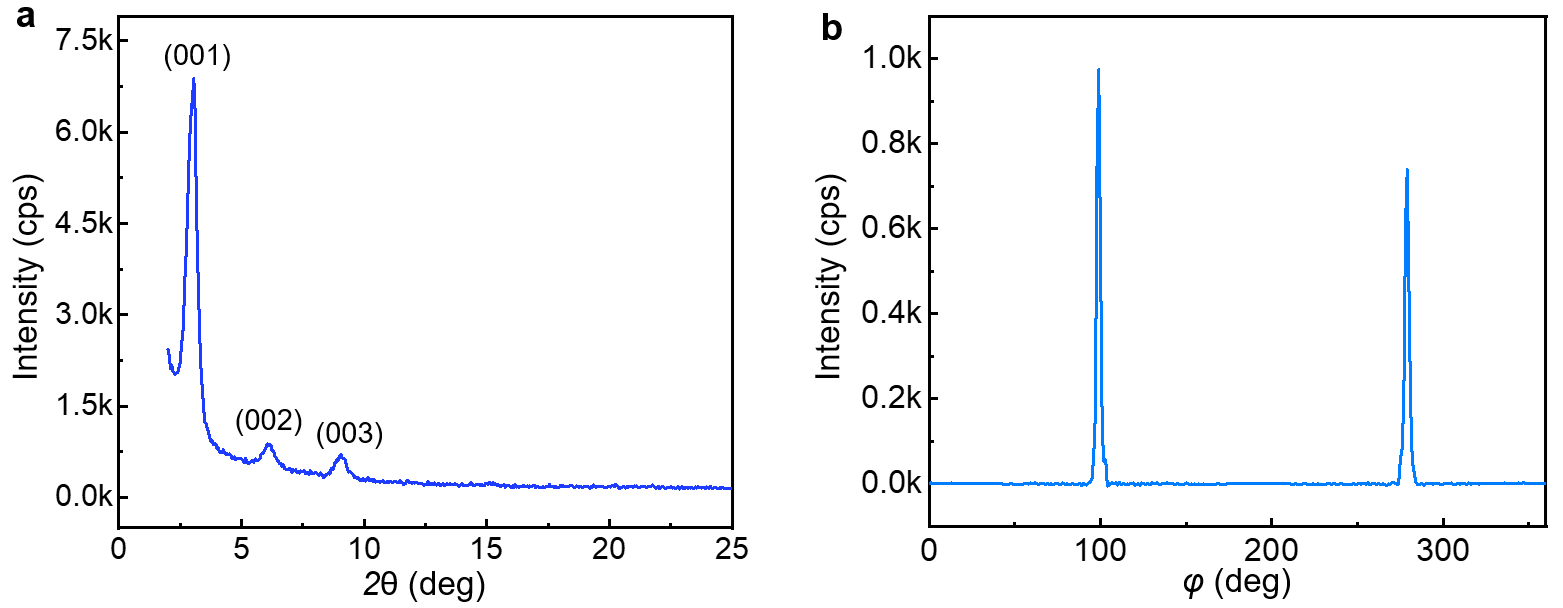


**Extended Data Fig. 24: Comparison of transfer curves for single-crystalline and polycrystalline devices. a,** Transfer characteristics in saturation regime (*V*DS = -1 V) of the C8-BTBT single-crystalline device and polycrystalline device. **b,** Transfer characteristics of the C8-BTBT single-crystalline film-based OTFET and C8-BTBT polycrystalline film-based field-effect transistor in the linear regimes at a low *V*DS of -0.01 V. **c, d,** POM images of the polycrystalline and single-crystalline devices.


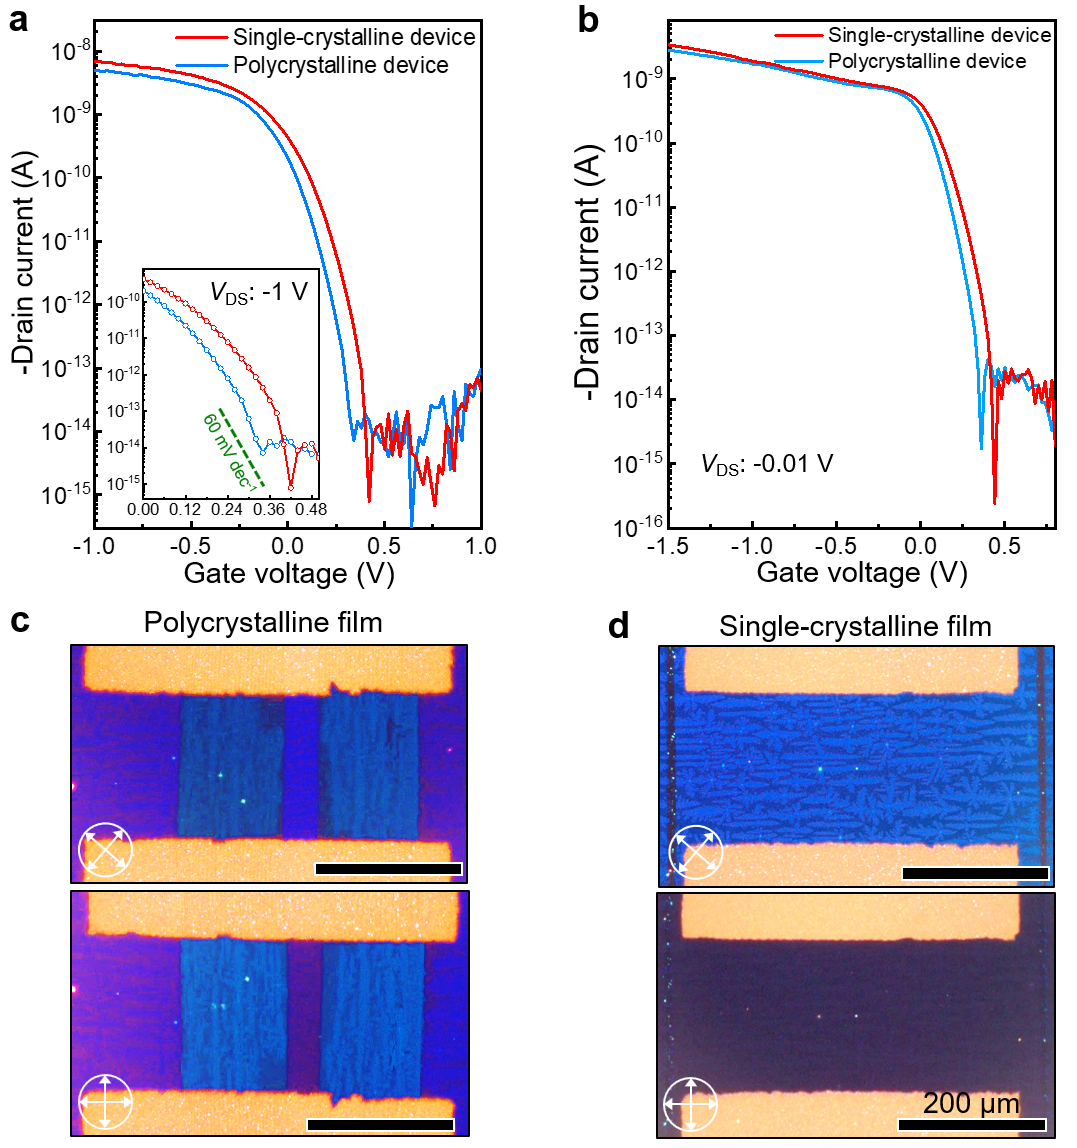


**Extended Data Fig. 25. Electrical properties of the neat C8-BTBT single-crystalline film-based FET. a,** Transfer characteristics of the neat C8-BTBT FET, (**b**) corresponding output curves. Compared to the FET based on the C8-BTBT single-crystalline film fabricated from a C8-BTBT: PS blend, the neat C8-BTBT field-effect transistor exhibits a larger *SS*. Inset: POM images of the neat C8-BTBT device.


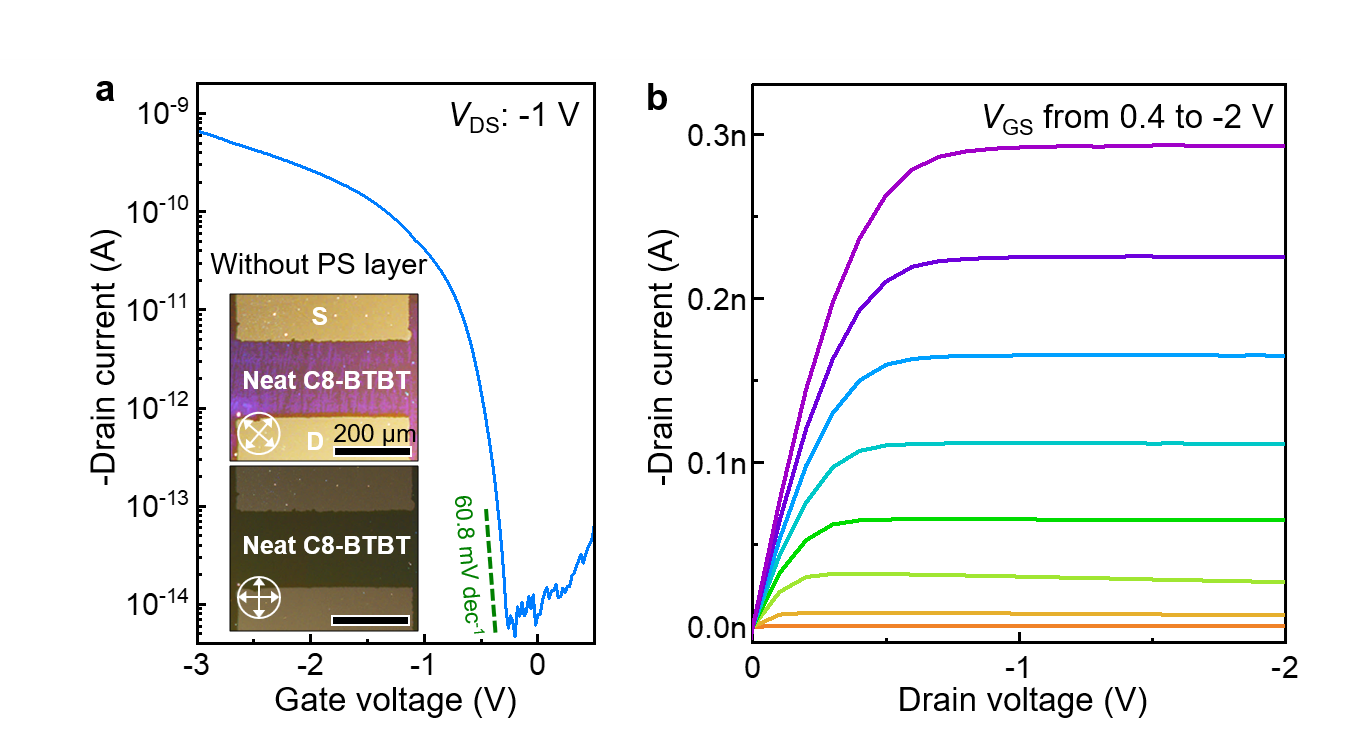


**Extended Data Fig. 26: Electrical properties of the FET based on thick C8-BTBT single-crystalline film. a,** POM images of the thick C8-BTBT device. **b,** Cross-sectional SEM image of the thick C8-BTBT film, showing 78.3-nm thickness. **c,** Transfer characteristics of the thick C8-BTBT film-based transistor. **d,** Corresponding output curves.


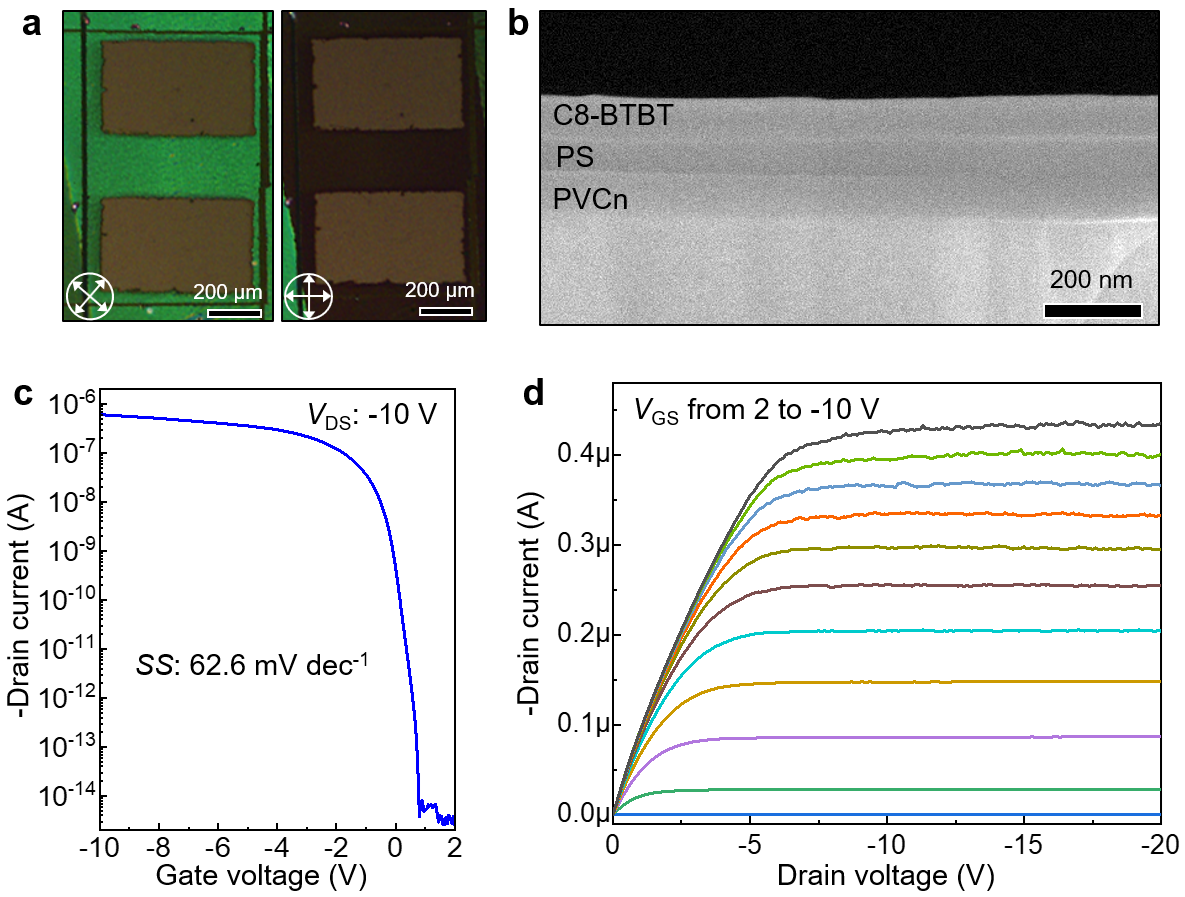


**Extended Data Fig. 27: Channel length-dependent performance of the devices. a-h** Transfer characteristics of the C8-BTBT single-crystalline film-based devices with different channel lengths.


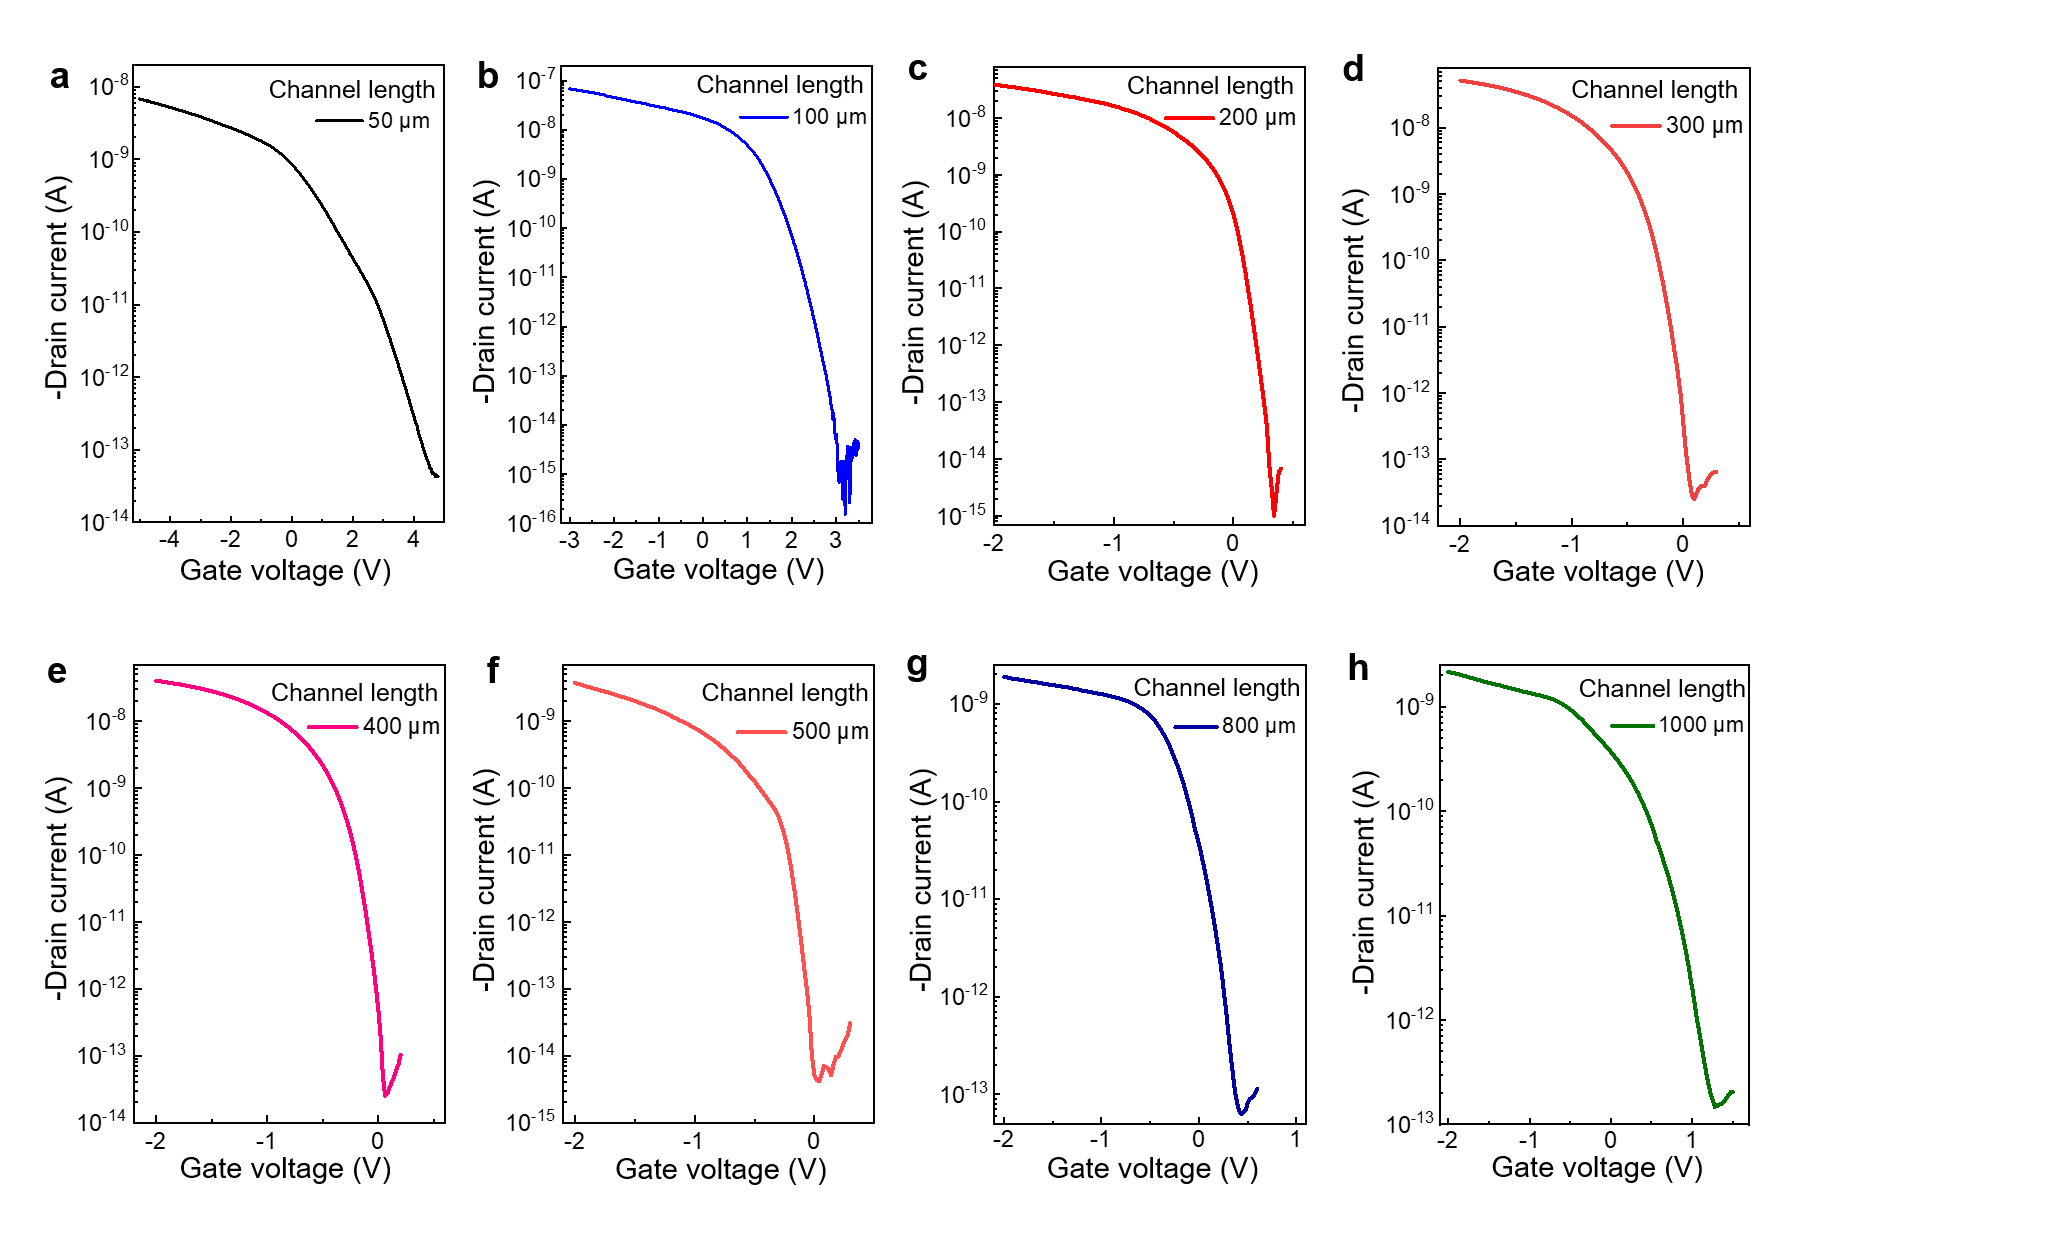


**Extended Data Fig. 28: Fabrication process of** **the ultrathin flexible OTFETs.** **a**, Schematic of fabrication procedure of ultrathin flexible OTFETs. **b,** Photograph of the ultrathin flexible OTFETs. The total thickness of the device is about 10 μm.


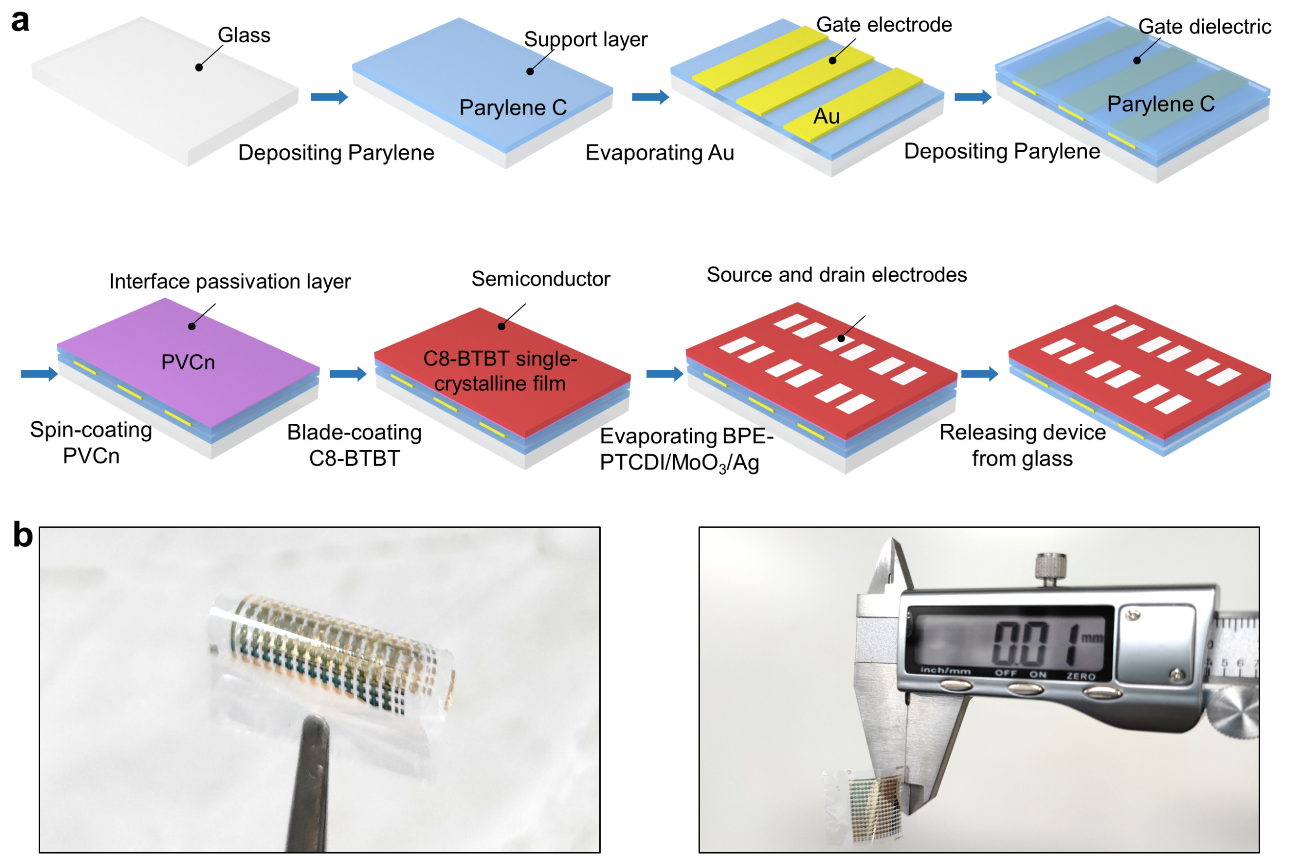


**Extended Data Fig. 29: Performance uniformity of the 5 × 6 flexible OTFET array. a,** Overlaid transfer curves of 30 flexible OTFETs. **b,** *SS* map for each flexible OTFET location. Statistics of **(c)** *SS* and (**d**) *P*sub-T from 30 flexible OTFETs.


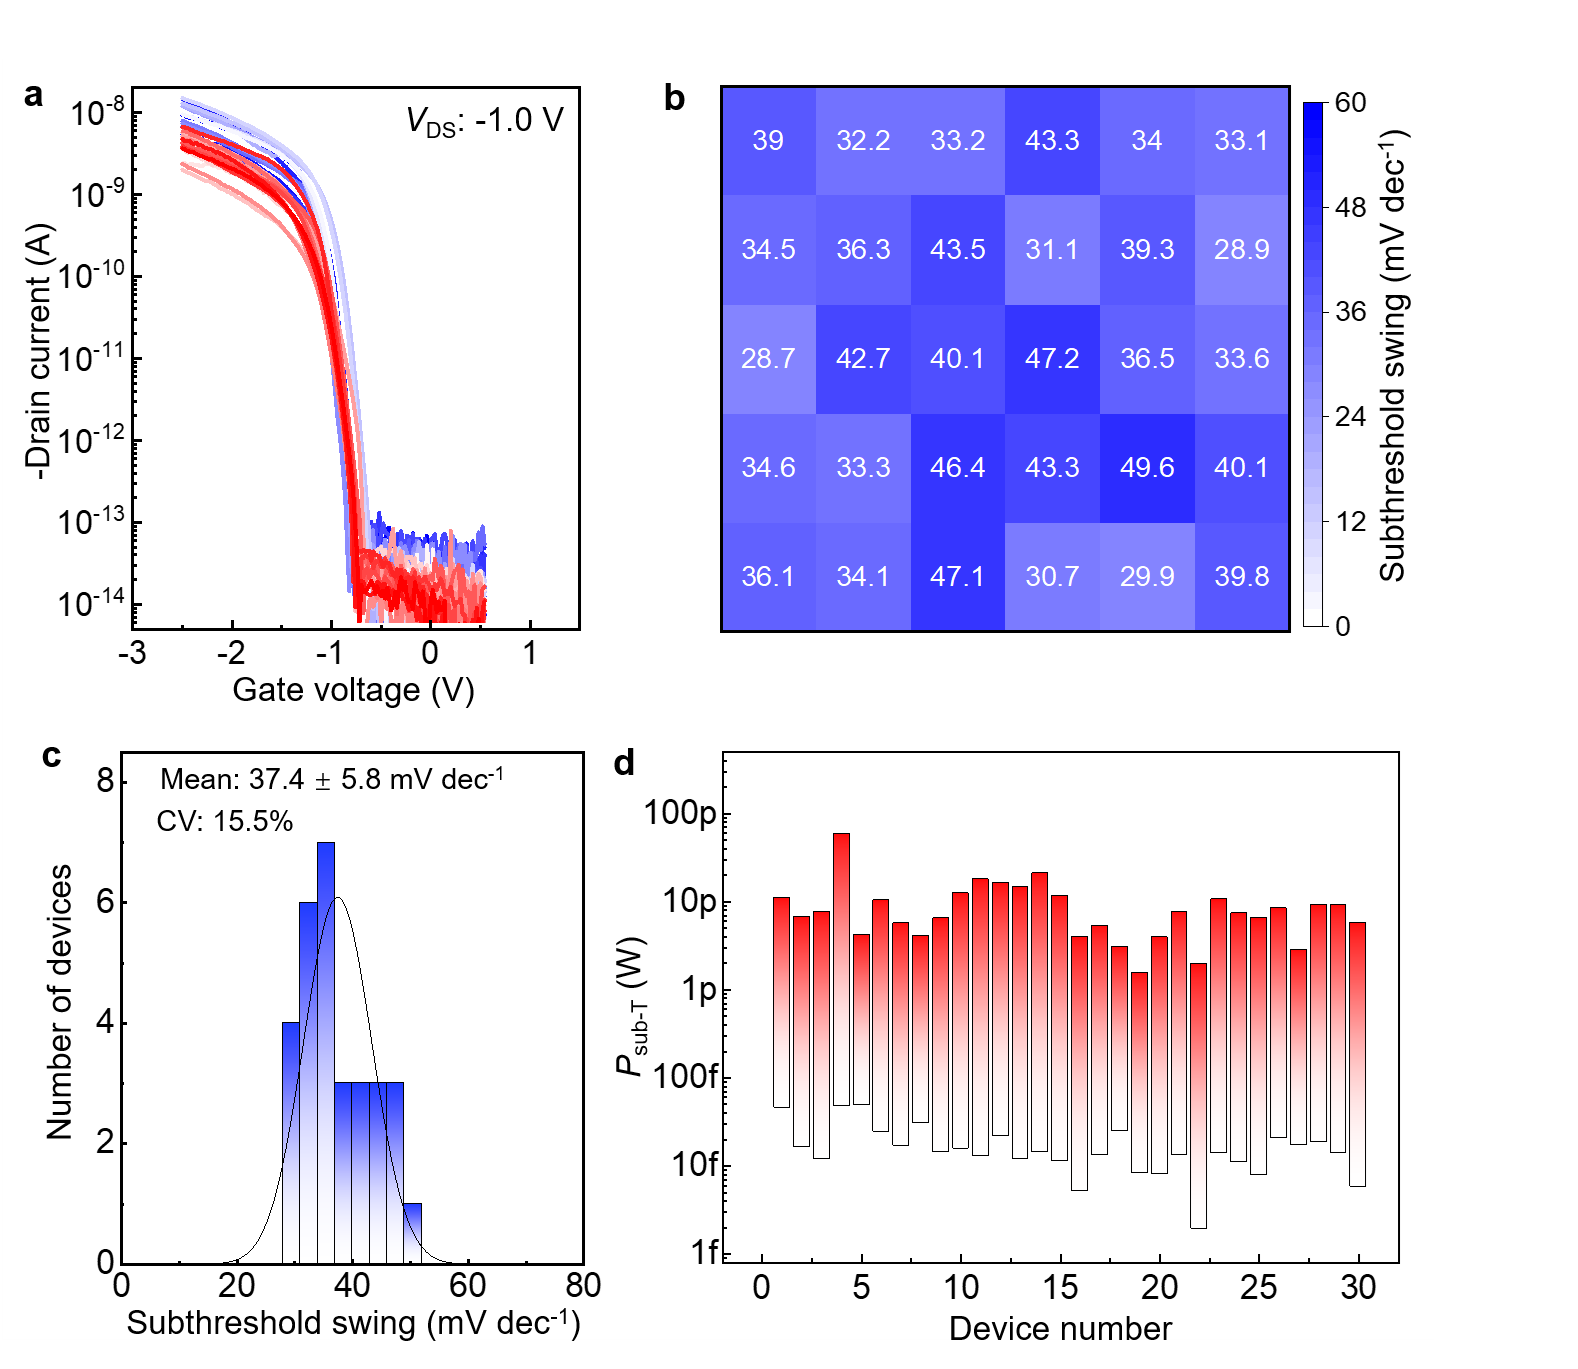


**Extended Data Fig. 30: Bending tests on the flexible OTFTs.** **a**, Measured transfer curves of the flexible OTFTs under different bending radii. **b**, *P*sub-T and *SS* as a function of the bending radius.


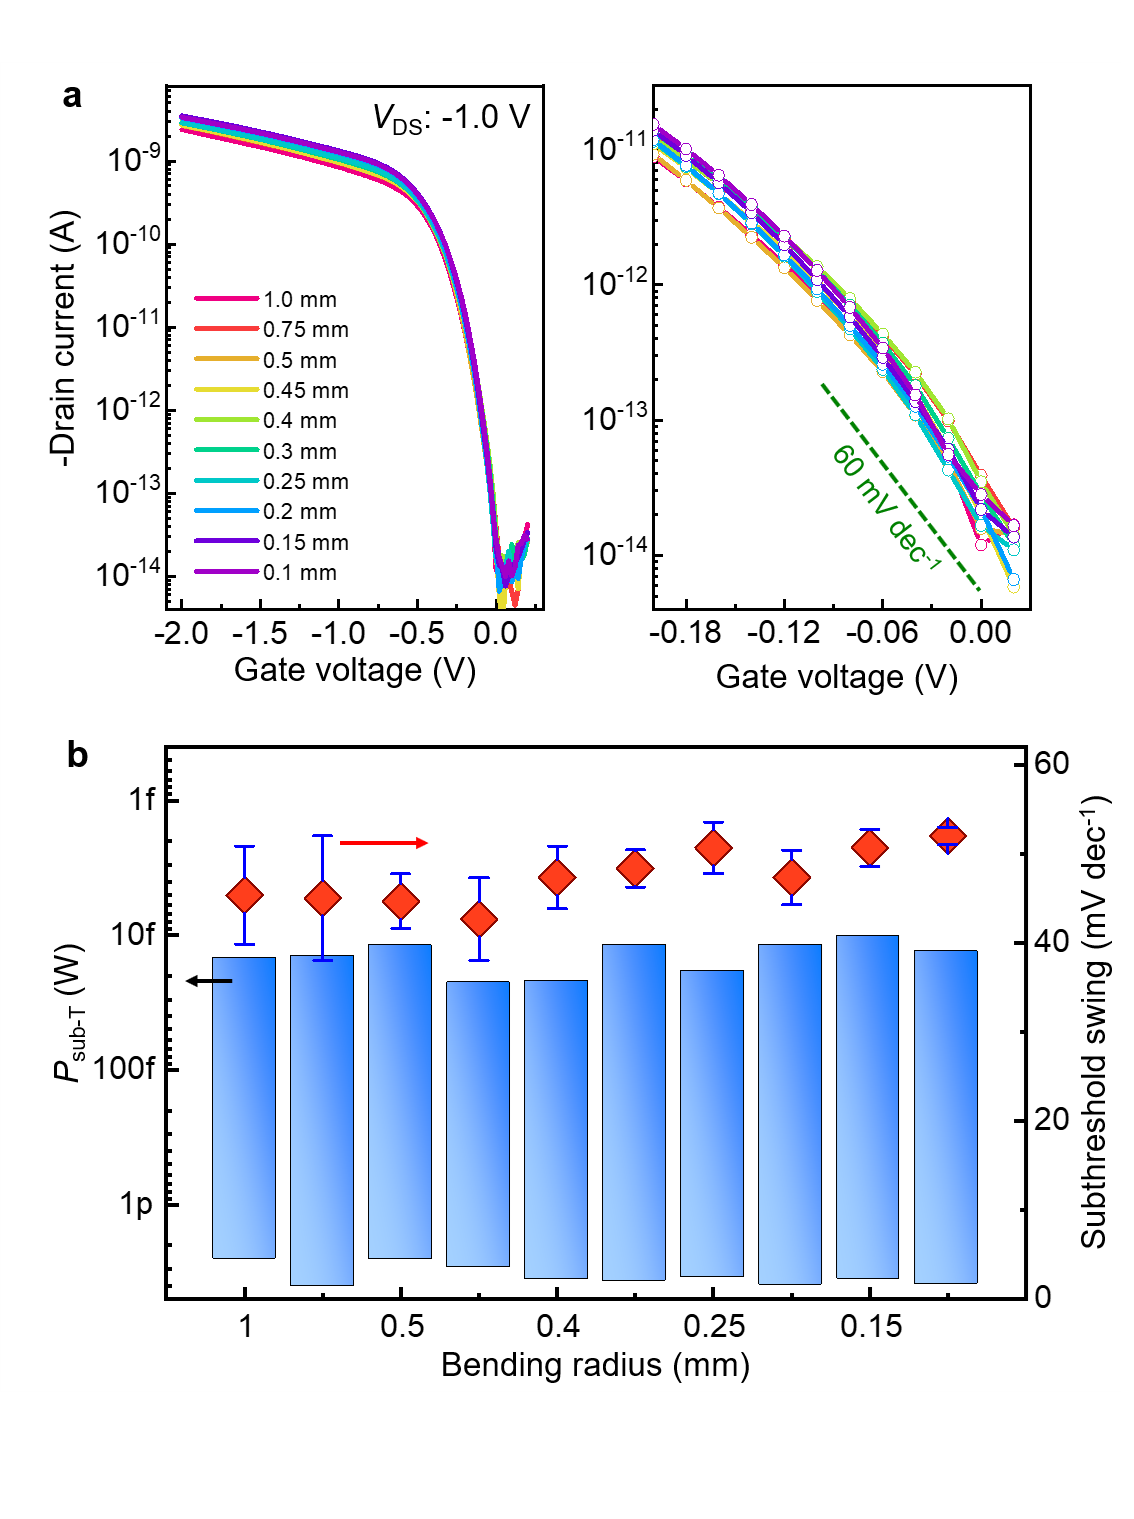


**Extended Data Fig. 31:** **Mechanical durability during repeated bending to 0.1 mm. a,** Measured transfer curves of the flexible OTFTs under different bending cycles. **b,** *SS* as a function of the number of bending cycle.


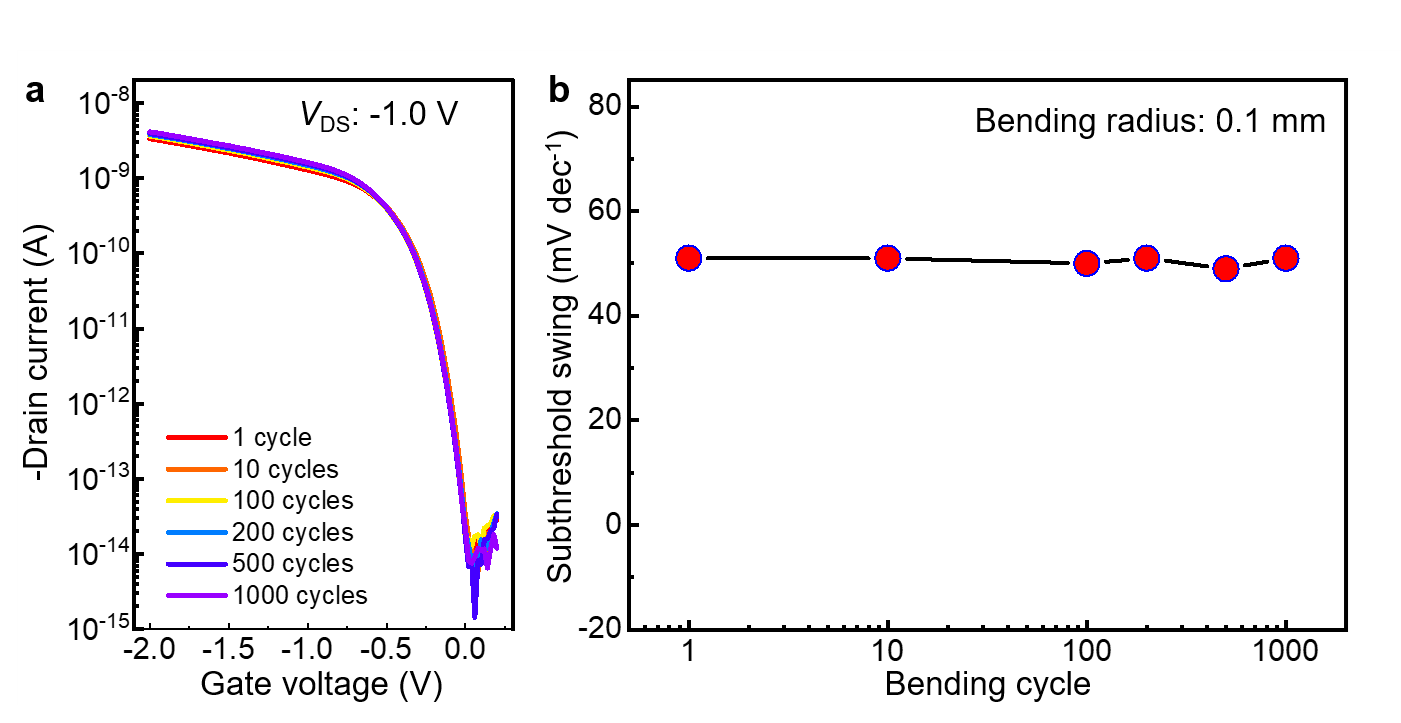


**Extended Data Fig. 32: Characterizations of dielectric properties. a,** Schematic illustration of the capacitor device structure (Au/insulator/Si). **b**, Frequency dependence of unit-area capacitance for gate dielectrics measured from the sandwich structure, showing a capacitance per unit area of 7.28 nF cm-2 at 1 KHz.


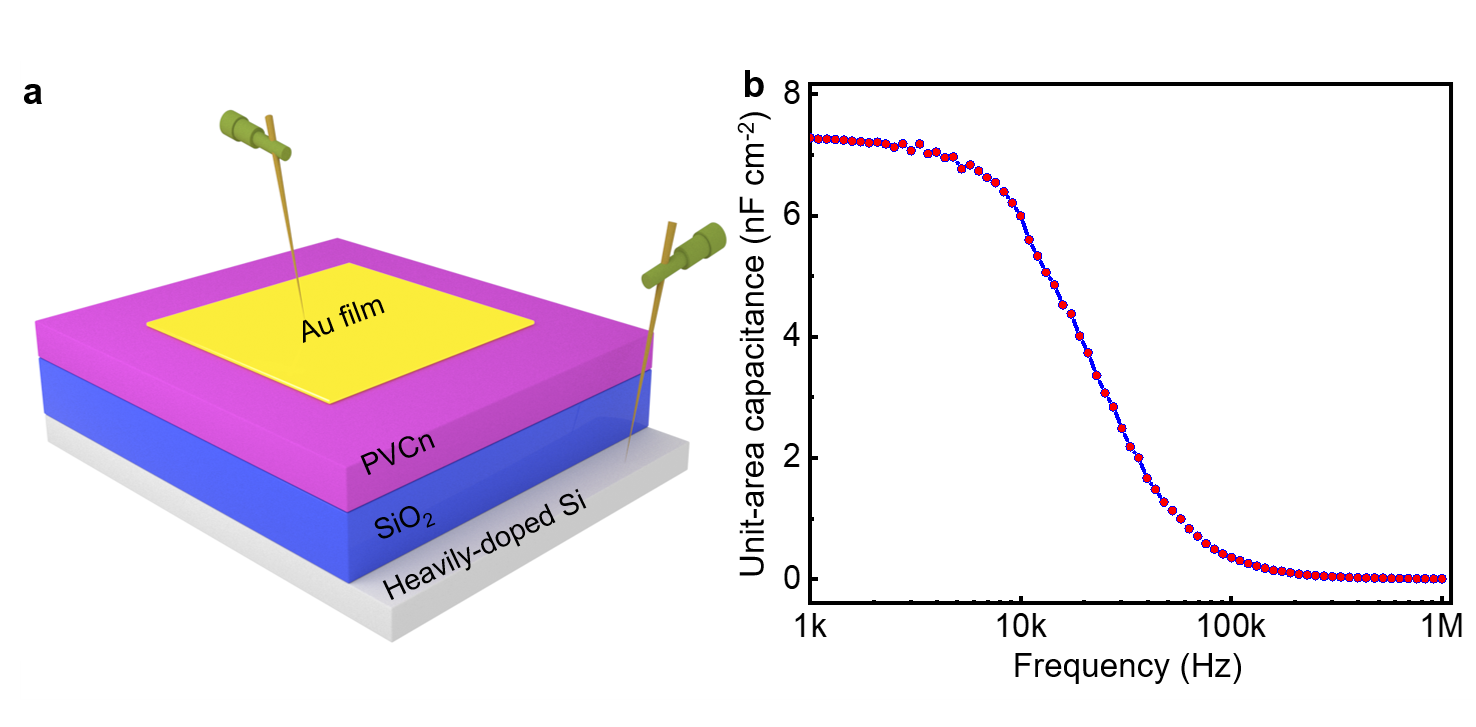


**Extended Data Fig. 33: Power spectral density of the ECG signals after amplification.**


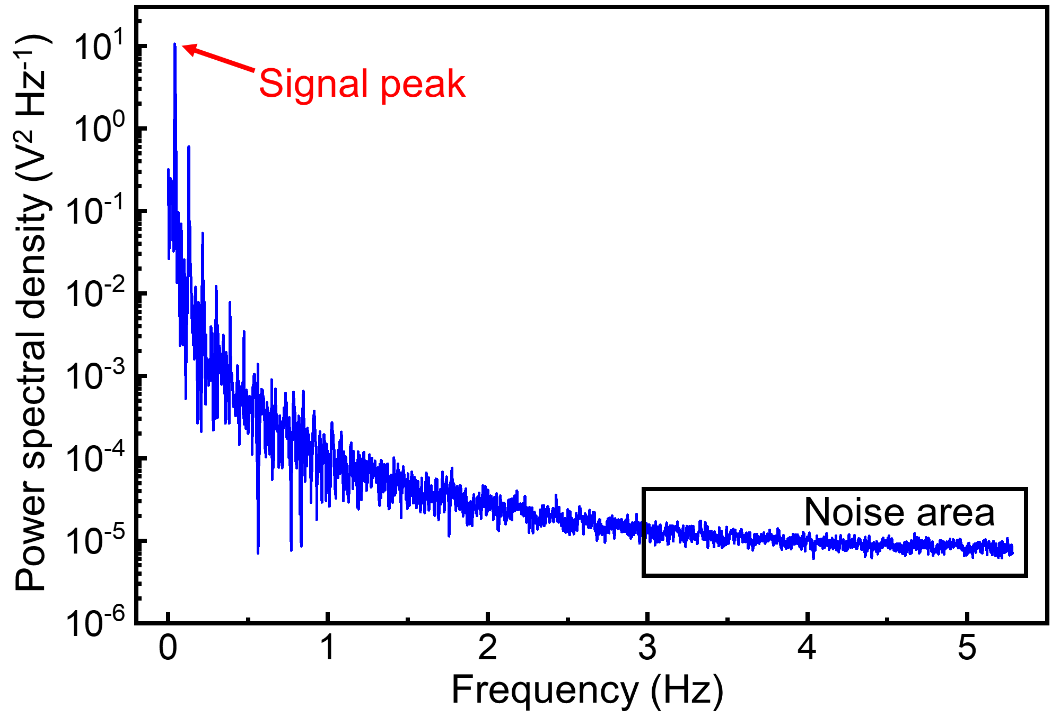


**Extended Discussion 1:** **Fundamental thermionic limitation of *SS* in the conventional OFETs.**

*SS* is defined as the inverse of the slope of the log(*I*DS) *vs*. *V*GS in the subthreshold regime18. To reduce power dissipation while improving signal amplification efficiency, the *SS* of OFETs should be reduced. However, there is a fundamental *SS* limit in conventional transistors and they need the *V*GS to be changed by at least 60 mV to cause a corresponding change of the *I*DS by one decade at room temperature19. Hence, in the case of conventional OFETs, it is not possible to reduce the supply voltage and still maintain a reasonable ON-OFF ratio. The fundamentally limited *SS* of 60 mV dec-1 for the conventional OFETs at room temperature can be explained below. For conventional transistor, the transport mechanism is based on the thermal carrier injection, which indicates that only carriers having energy higher than the barrier height can inject into the channel and contribute to the current20. Because electrons in the source is distributed according to the Boltzmann distribution, in which electron density per unit energy (*n*) decreases exponentially with an increase in energy (*E*) (*n* ∝ *e*-*E/kBT*). Thus, with a decrease in barrier height by applying *V*GS (i.e. gate electrostatic), current would increase. The applied *V*GS could modulate the surface potential of the semiconductor (*ψ*). In the ideal case, the change in *V*GS would produce almost the same change in *ψ*, *i.e*. ∆*ψ* =∆*V*GS and decreases in barrier by the same amount. So the current can be expressed as:

With the definition of *SS*, we have

Hence, the minimum value for *SS* can be calculated as [*k*BT/*q*ln(10)], which has the value of about 60 mV dec-1 at room temperature.

**Extended Discussion 2: Power consumption of OFET** **at the** **subthreshold regime (*****P*sub-T).**

For deployment of OFETs in flexible and wearable applications, low power is crucial because the operation of the wearable device is challenged by the limited battery lifetime even if it is augmented with energy harvesting21. In addition, these OFETs also require to work at the subthreshold regime for achieving high signal amplification efficiency. Therefore, low *P*sub-T will make the OFETs suitable for use on flexible and wearable sensors to monitor weak physiological signals. The *P*sub-T can be calculated as *I*DS, sub-T × *V*DS, where *V*DS is the supply voltage and *I*DS, sub-T is the current at the subthreshold regime.

**Extended Discussion 3: Relationship between subthreshold swingand signal amplification efficiency.**

The *I*DS-*V*GS curve in the transistor’s subthreshold regime can be written as an exponential relation:

where *I*ref is the reference current at *V*GS=*V*ref. According to the definition of *g*m, we can deduce

and signal amplification efficiency (*A*eff) can be expressed as22

*A*eff is inversely proportional to *SS* and thus increases as reducing *SS.*

**Extended Discussion 4: The signatures for BTBT.**

In the conventional OFETs, charge carriers require to cross a barrier and thermally inject into the channel over the barrier. Since the carriers in the source have Boltzmann distribution, the current through the energy barrier can be expressed as23

where *I*0 is a reverse saturation current, *q* is the carrier charge, *V*0 is the built-in potential, *K*B is the Boltzmann constant, and *T* is the temperature. From the equation, we can get

Therefore, *SS* changes linearly with *T* in the conventional OFETs. However, in the TFETs, the primary carrier injection mechanism is BTBT, in which thermally activated sections of the source Fermi distributions are below conduction band minimum and above valence band maximum of the source, and hence the tunnelling channel is effectively blocked and the tunnelling probability should be temperature independent24,25. In this study, we can confirm the charge injection mechanisms in our devices by investigating the temperature dependence of *SS*. We measured transfer curves *I*DS vs. *V*GS for a fixed *V*DS = -1 V at temperature ranging from 195 to 300 K (see Extended Data Fig. 8a,b). From the transfer curves, we extracted average *SS* over one decade of *I*DS, showing *SS* is temperature independent. This result reflects that BTBT is the dominant charge injection mechanism for our OTFETs with a subthermionic *SS* since the OTFETs are effectively “cooled down” and acting as devices at a low temperature. In addition, we also measured the transfer curves when the OTFETs were warmed up from 300 to 320 K in air. The threshold voltage positively shifted and the current increased with increasing temperature (see Extended Data Fig. 8c). However, the extracted *SS* was observed to be nearly temperature independent and the *SS* under various temperatures were smaller than the corresponding thermionic limit (see Extended Data Fig. 8d). These observations once again confirmed that the charge injection mechanism in the OTFETs was dominated by the BTBT rather than thermionic emission.

**Extended Discussion 5: The reason behind the trend towards negative differential resistance (NDR) in our OTFETs**

NDR is also a key evidence for BTBT in TFETs26. Previous reports have shown that the prominent NDR can be absent in case either p or n-region is lightly doped27-30. In our OTFETs, the p-region C8-BTBT channel and n-region MoO3 are lightly doped, thus the BTBT energy window at forward bias voltage is very small and BTBT current is not substantially higher than the thermionic current. This causes a smooth transition from tunneling to thermionic emission, showing a trend toward NDR.

**Extended Discussion 6: Identification of C8-BTBT single-crystalline thin films.**

We have identified C8-BTBT single-crystalline thin film by combining three different characterization methods: polarized optical microscopy (POM), transmission electron microscopy (TEM), and in-plane grazing-incidence X-ray diffraction (GIXRD). POM is a powerful technique to assess crystal orientation and thickness variation through the observation of interference colours31. POM images of the C8-BTBT thin films(Extended Data Fig. 21) show the uniform colour of the crystal domain. The width of crystal domain is around 0.5 mm and its length can be extended to a centimetre scale. In addition, when the sample is rotated relative to one of the polarisers’ axes by 360o, the colour change from bright to dark is continuous and periodical, presenting a fourfold symmetry. This is a typical single-crystalline domain behaviour. Further, the C8-BTBT thin films on the SiO2/Si substrate were transferred onto a Cu grid for TEM characterization. TEM images show no detectable grain boundary. Selected-area electron diffraction (SAED) results collected from five different regions in one domain all exhibit very sharp diffraction spots and the same diffraction patterns, confirming the single-crystalline nature of the crystal domain (Extended Data Fig. 22). Finally, the crystal quality of the centimetre-scale C8-BTBT thin films was examined by GIXRD (Extended Data Fig. 23). The out-of-plane GIXRD result shows three dominant diffraction peaks at 3°, 6°, and 9°, corresponding to the (001), (002), and (003) planes, respectively, which suggests that the C8-BTBT thin films have a preferential orientation of [001] in the normal direction of the substrate. We further studied the in-plane crystal orientation of the C8-BTBT thin film with an azimuthal X-ray φ-scan on the (020) reflection. As the incident X-ray was parallel to the blade-coating direction, the high intensities of (020) diffractions were located at *φ*1 = 101.15° and *φ*2 = 281.15o, indicating that the (020) planes are well perpendicular to the blade-coating direction. All of these results collectively demonstrate the single-crystalline nature of the resulting C8-BTBT thin film over a centimetre scale.

**Extended Discussion 7: Extraction of device** **electrostatics.**

Device electrostatics is the ability of the transistor’s gate voltage to control its channel potential and is given by the ratio of the change in gate voltage (*V*GS) to the change in semiconductor surface potential (*ψ*)32. In the case of perfect electrostatics, the device electrostatics is 1.0 (ref. 33), which means a change in ∆*V*GS leads to almost similar change in ∆*ψ*. We calculated free carrier density (*Q*free) to acquire the relation of *ψ* to *V*GS by measuring the transfer curves at the linear regime34. The free charge density is solved from the current-voltage (*I*DS-*V*DS) relation of:

where *μ* is the mobility, and *W* and *L* are the channel width and length, respectively. Due to the channel conductivity (*σ*ch) relation of *σ*ch=*I*DS*L*/*V*DS*W*, we derived

The *Q*free is a function of *V*GS, and it also relates to the free hole carrier density *p*free through *Q*free=*qp*free*λ*free. The *λ*free is the effective channel thickness of the induced free carrier sheet and can be given by *λ*free=(*λ*D-1+*t*S-1)-1, where *λ*D is the free carrier Debye length and *t*S is the thickness of the semiconductor channel layer. The *λ*D can be calculated using *ε*S*kBT*/(*qQ*free), where *ε*S is the permittivity of the C8-BTBT. *λ*D and therefore *λ*free are both functions of *V*GS. Substituting the *Q*free and *λ*free, we obtained the *p*free with the equation:

To get the relation of *p*free to *φ*S, we employed the Boltzmann’s equation:

where *P*HOMO is the effective density of free carriers, *E*F0 is the equilibrium Fermi level, *E*HOMO is the energy level of HOMO. From the above two equations, the relationship between *φ*S and *V*GS could be obtained:

Therefore, device electrostatics, i.e. d*φ/dV*GS can be calculated.

**Extended** **Discussion 8: The relation between device dimension (channel length and thickness) and electrostatics.**

Device electrostatics depends on the gate capacitance and channel thickness. To achieve excellent electrostatics, the natural length (λ) should be reduced. The λ for field-effect transistors can be expressed as35:

where *t*c and *ε*s are the thickness and permittivity of the device channel, respectively, *C*i is the gate capacitance per unit area. Therefore, reducing the channel thickness is beneficial to lower the λ, thus improving device electrostatics.

In a field-effect transistor, current flows through a semiconducting channel between the source (S) and drain (D) electrodes. The current flow is controlled by a gate electrode. However, when the device channel length is reduced, DS electric field starts to influence the channel potential and the gate can no longer effectively control the channel potential, resulting in the degradation of device electrostatics36. Hence, a shorter device channel will deteriorate the switching characteristic of transistors.

**Extended Table 1: Compare the amplitude and *SNR* of our EOG signals with previous reports.**

|  | **Amplitude (V)** | ***SNR* (dB)** | **References** |
| --- | --- | --- | --- |
| **1** | **0.684** | **71.5** | **This work** |
| 2 | 0.2 | 60 | 4 |
| 3 | 0.00068 | 38.7 | 37 |
| 4 | 0.04 | - | 38 |
| 5 | 0.0005 | 15.22 | 39 |
| 6 | 0.0001 | - | 40 |
| **7** | 0.09785 | 49.26 | 41 |
| 8 | 0.0017 | 28 | 42 |
| 9 | 0.0005 | - | 43 |
| 10 | 0.08 | - | 44 |

**Extended Table 2: Summary of figure-of-merit parameters of a typical OTFET in the array.**

| **Merit parameters** | **OTFET** |
| --- | --- |
| Subthreshold swing (*SS*) | 34.5 mV dec-1 |
| Signal amplification efficiency (*A*eff) | 66.7 |
| Mobility (*μ*) | 2.47 cm2 V-1 s-1 |
| Threshold voltage (*V*T) | -0.13 V |
| Operating voltage | ~1.0 V |
| On-off ratio (*I*on/*I*off) | 1.95 × 107 |

**References:**

1. Raveendran, R., Namboothiry, M. A. G. Bias stress stability and hysteresis in elastomeric dielectric based solution processed OFETs. *Mater. Res. Bull.* **146**, 111596 (2022).
2. Kaltenbrunner, M. *et al.* An ultra-lightweight design for imperceptible plastic electronics. *Nature* **499**, 458-463 (2013).
3. Jiang, C. *et al.* Printed subthreshold organic transistors operating at high gain and ultralow power. *Science* **363**, 719-723 (2019).
4. Zschieschang, U. *et al*. Flexible low-voltage organic transistors and circuits based on a high-mobility organic semiconductor with good air stability. *Adv. Mater.* **22**, 982-985 (2010).
5. Kraft, U. *et al*. Flexible low-voltage organic complementary circuits: finding the optimum combination of semiconductors and monolayer gate dielectrics. *Adv. Mater.* **27**, 207-214 (2015).
6. Seong, H. *et al*. A low-voltage organic complementary inverter with high operation stability and flexibility using an ultrathin iCVD polymer dielectric and a hybrid encapsulation layer. *Adv. Electron. Mater.* **2**, 1500385 (2016).
7. Su, Y. *et al*. Low-voltage organic field-effect transistors (OFETs) with solution-processed metal-oxide as gate dielectric. *ACS Appl. Mater. Interfaces* **3**, 4662-4667 (2011).
8. Haase, K. *et al*. Solution shearing of a high-capacitance polymer dielectric for low-voltage organic transistors. *Adv. Electron. Mater.* **5**, 1900067 (2019).
9. Yamamura, A. *et al.* Wafer-Scale, layer-controlled organic single crystals for high-speed circuit operation. *Sci. Adv.* **4**, eabo5758 (2018).
10. Kitahara, G. *et al.* Meniscus-controlled printing of single-crystal interfaces showing extremely sharp switching transistor operation. *Sci. Adv.* **6**, eabo8847 (2020).
11. Kitahara, G., Ikawa, M., Matsuoka, S., Arai, S. & Hasegawa, T. Approaching trap-minimized polymer thin-film transistors. *Adv. Funct. Mater.* **31**, 2105933 (2021).
12. Jiang, C., Ma, H., Hasko, D. G., Guo, X. & Nathan, A. A lewis-acid monopolar gate dielectric for all-inkjet-printed highly bias-stress stable organic transistors. *Adv. Electron. Mater.* **3**, 1700029 (2017).
13. Huang, Y. *et al*. Scalable processing of low voltage organic field effect transistors with a facile soft-contact coating approach. *IEEE Electron Device Lett.* **40**, 1945-1948 (2019).
14. Feng, L. *et al*. Unencapsulated air-stable organic field effect transistor by all solution processes for low power vapor sensing. *Sci. Rep.* **6**, 20671 (2016).
15. Luo, Z. *et al*. Sub-thermionic, ultra-high-gain organic transistors and circuits. *Nat. Commun.* **12**, 1928 (2021).
16. Duan, Y. *et al.* Low-power-consumption organic field-effect transistors. *J. Phys. Mater.* **3**, 014009 (2020).
17. Simeone, D., Rapisarda, M., Fortunato, G., Valletta, A. & Mariucci, L. Influence of structural properties on environmental stability of pentacene thin film transistors. *Org. Electron.* **12**, 447-452 (2011).
18. Cao, W., Sarkar, D., Khatami, Y., Kang, J. & Banerjee, K. Subthreshold-swing physics of tunnel field-effect transistors. *AIP Adv.* **4**, 067141 (2014).
19. Cheung, K. *et al.* On the 60 mV/dec @300 K limit for MOSFET subthreshold swing. Proceedings of 2010 International Symposium on VLSI Technology, System and Application, 72-73 (2010)
20. Zhao, C. *et al.* Improving subthreshold swing to thermionic emission limit in carbon nanotube network film-based field-effect. *Appl. Phys. Lett.* **112**, 053102 (2018).
21. Dieffenderfer, J. *et al.* Low-power wearable systems for continuous monitoring of environment and health for chronic respiratory disease. *IEEE J Biomed. Health Inform.* **20**, 1251-1264 (2016).
22. Tang, W. *et al.* Solution processed low power organic field-effect transistor bio-chemical sensor of high transconductance efficiency. *npj Flex. Electron.* **6**, 18 (2022).
23. Zhai, Y., Feng, Z., Zhou, Y. & Han, S. T. Energy-efficient transistors: suppressing the subthreshold swing below the physical limit. *Mater. Horiz.* **8**, 1601-1617 (2021).
24. Shin, G. H. *et al*. Vertical-tunnel field-effect transistor based on a silicon-MoS2 three-dimensional-two-dimensional heterostructure. *ACS Appl. Mater. Interfaces* **10**, 40212-40218 (2018).
25. Lan, Y. W. *et al.* Atomic-monolayer MoS2 band-to-band tunneling field-effect transistor. *Small* **12**, 5676-5683 (2016).
26. Xiong, X. *et al.* A transverse tunnelling field-effect transistor made from a van der waals heterostructure. *Nat. Electron.* **3**, 106-112 (2020).
27. Kim, S. *et al.* Thickness-controlled black phosphorus tunnel field-effect transistor for low-power switches. *Nat. Nanotechnol.* **15**, 203-206 (2020).
28. Liu, F., Wang, J. & Guo, H. Negative differential resistance in monolayer WTe2 tunneling transistors. *Nanotechnol.* **26**, 175201 (2015).
29. Zhao, Y. *et al.* Negative differential resistance in boron nitride graphene heterostructures: physical mechanisms and size scaling analysis. *Sci. Rep.* **5**, 10712 (2015).
30. Li, M. *et al.* Two-dimensional heterojunction interlayer tunnel FET (thin-TFET): from theory to applications*.* *2016 IEEE International Electron Devices Meeting* 1921-1924 (2016)
31. Pan, Z. *et al.* Polarization-resolved spectroscopy imaging of grain boundaries and optical excitations in crystalline organic thin films. *Nat. Commun.* **6**, 8201 (2015).
32. Suh, M. S. *et al.* Surface potential mapping in the SiO2 system using a FET cantilever. *Curr. Appl. Phys.* **6**, 224-231 (2006).
33. Raad, B. R., Sharma, D. & Tirkey, S. Source engineered tunnel FET for enhanced device electrostatics with trap charges reliability. *Microelectron. Eng.* **194**, 79-84 (2018).
34. Lee, S. & Nathan, A. Localized tail state distribution in amorphous oxide transistors deduced from low temperature measurements. *Appl. Phys. Lett.* **101**, 113502 (2012).
35. Li, D. *et al.* Two-dimensional non-volatile programmable p-n junctions. *Nat. Nanotechnol.* **12**, 901-906 (2017).
36. Roy, A. S., Mudanai, S. P. & Stettler, M. Mechanism of long-channel drain-induced barrier lowering in halo MOSFETs. *IEEE Trans. Electron Devices* **58**, 979-984 (2011).
37. Peng, H.-L., Sun, Y.-l., Bi, C. & Li, Q.-F. Development of a flexible dry electrode based MXene with low contact impedance for biopotential recording. *Measurement* **190**, 110782 (2022).
38. Toral, V. *et al*. A versatile wearable based on reconfigurable hardware for biomedical measurements. *Measurement* **201**, 111744 (2022).
39. Xu, J. *et al.* Electrooculography and tactile perception collaborative interface for 3D human-machine interaction. *ACS Nano* **16**, 6687-6699 (2022).
40. Kim, N. I. *et al*. Highly-sensitive skin-attachable eye-movement sensor using flexible nonhazardous piezoelectric thin film. *Adv. Funct. Mater.* **31**, 2008242 (2020).
41. Yao, Y. *et al.* Flexible complementary circuits operating at sub-0.5 V via hybrid organic-inorganic electrolyte-gated transistors. *Proc. Natl. Acad. Sci. U S A* **118**, 2111790118 (2021).
42. Jia, Y. & Tyler, C. W. Measurement of saccadic eye movements by electrooculography for simultaneous EEG recording. *Behav. Res. Methods* **51**, 2139-2151 (2019).
43. Ameri, S. K. *et al*. Imperceptible electrooculography graphene sensor system for human-robot Interface. *npj 2D Mater. Appl.* **2**, 19 (2018).
44. Wu, X. et al. All-polymer bulk-heterojunction organic electrochemical transistors with balanced ionic and electronic transport. Adv. Mater. **34**, 2206118 (2022).
